# Supplementary material
Source: ML conference proceedings conference paper supplement (https://proceedings.neurips.cc/paper_files/paper/2023/hash/4c454d34f3a4c8d6b4ca85a918e5d7ba-Abstract.html)
Supplement: Supplementary file 1 [file 4c454d34f3a4c8d6b4ca85a918e5d7ba-Supplemental-Conference.pdf]

---

# Improved Convergence in High Probability of Clipped Gradient Methods with Heavy Tailed Noise

---

Anonymous Author(s)

Affiliation

Address

email

## Abstract

1 In this work, we study the convergence *in high probability* of clipped gradient  
2 methods when the noise distribution has heavy tails, i.e., with bounded  $p$ th mo-  
3 ments, for some  $1 < p \leq 2$ . Prior works in this setting follow the same recipe of  
4 using concentration inequalities and an inductive argument with union bound to  
5 bound the iterates across all iterations. This method results in an increase in the  
6 failure probability by a factor of  $T$ , where  $T$  is the number of iterations. We in-  
7 stead propose a new analysis approach based on bounding the moment generating  
8 function of a well chosen supermartingale sequence. We improve the dependency  
9 on  $T$  in the convergence guarantee for a wide range of algorithms with clipped  
10 gradients, including stochastic (accelerated) mirror descent for convex objectives  
11 and stochastic gradient descent for nonconvex objectives. Our high probability  
12 bounds achieve the optimal convergence rates and match the best currently known  
13 in-expectation bounds. Our approach naturally allows the algorithms to use time-  
14 varying step sizes and clipping parameters when the time horizon is unknown,  
15 which appears difficult or even impossible using the techniques from prior works.  
16 Furthermore, we show that in the case of clipped stochastic mirror descent, several  
17 problem constants, including the initial distance to the optimum, are not required  
18 when setting step sizes and clipping parameters.

## 19 1 Introduction

20 Stochastic optimization is a well-studied area with many applications ranging from machine learn-  
21 ing, to operation research, numerical linear algebra and beyond. In contrast to deterministic algo-  
22 rithms, stochastic algorithms might fail, and a pertinent question is how often does failure happen  
23 and how to increase the success rate. These questions are especially important in critical appli-  
24 cations where failure is not tolerable, or when a single run is costly in time and resources. For-  
25 tunately, the standard stochastic gradient descent (SGD) algorithm has been shown to converge  
26 with *high probability* under a *light-tailed noise* distribution such as sub-Gaussian distributions  
27 [22, 11, 26, 13, 10, 9, 17], which gives strong guarantee on the success of single runs. However,  
28 recent observations in popular deep learning applications, such as training attention models [32] and  
29 convolutional networks [29], reveal a more challenging optimization landscape: the gradient noises  
30 follow *heavy-tailed* distributions, where the variance may be infinite [28, 32, 8], whereas the stan-  
31 dard light-tailed setting assumes that all the moments are bounded. Heavy-tailed gradient noises  
32 can cause algorithms like SGD to fail, and this mismatch between theory and practice has been sug-  
33 gested to be one of the reasons for the strong preference of adaptive methods like Adam over SGD  
34 in modern settings [32].

35 In this work, we consider the setting of *heavy-tailed noise* proposed by Zhang et al., (2020) [32],  
36 where the (unbiased) gradient noise only has bounded  $p$ th moments, for some  $p \in (1, 2]$ . While

standard SGD can fail to converge when the variance is unbounded, i.e. when  $p < 2$ , [32] show that SGD with appropriate clipping (or *Clipped-SGD*) converges *in expectation* under heavy-tailed noise, where the convergence rate depends on  $O(\frac{1}{\delta})$  if  $\delta$  is the targeted maximum failure probability. It is more desirable, however, to obtain convergence results in *high probability*, where the convergence rate depends instead on  $O(\log \frac{1}{\delta})$ , which gives better guarantees for single runs.

Recent follow-up works [1, 27, 18] show that variants of Clipped-SGD in fact converge with high probability. This is a pleasing result, extending the earlier work by [6] for  $p = 2$ . However, there are several shortcomings of these results when compared with the corresponding bounds in the light-tailed setting. First, the clipped algorithm uses a fixed step size and a fixed clipping parameter depending on the number of iterations, which precludes results with *unknown* time horizons. Secondly, the convergence guarantees are worse than the light-tailed bounds by a  $\log T$  factor, even for fixed step sizes and clipping parameters. These issues beg a qualitative question:

*Is heavy-tailed noise inherently harder than light-tailed noise?*

In this work, we answer the above question for Clipped-SGD and the general clipped (accelerated) stochastic mirror descent (*Clipped-SMD*) algorithm. We give an improved analysis framework that not only gives tighter bounds matching the light-tailed noise setting, but also allows for step sizes and clipping parameters for unknown time horizons. Furthermore, we show that this framework is applicable to various settings, from finding minimizers of convex functions with arbitrarily large domains using (accelerated) mirror descent, to finding stationary points for non-convex functions using gradient descent.

## 1.1 Contributions and Techniques

Our work addresses several open questions posed by previous works including handling general domains and dealing with an unknown time horizon under heavy-tailed noise. Qualitatively, we close the logarithmic suboptimality gap and achieve the optimal rate in several settings. More specifically:

- We demonstrate a novel approach to analyze clipped gradient methods in high probability that is general and applies to various standard settings. In the convex setting, we analyze Clipped-SMD and clipped stochastic accelerated mirror descent. In the non-convex setting, we analyze Clipped-SGD. Using our new analysis, we show that clipped methods attain time-optimal convergence in high probability for both convex and nonconvex objectives under heavy-tailed gradient noise. In the convex setting, we obtain an  $O\left(T^{\frac{1-p}{p}}\right)$  convergence rate for arbitrary (not necessarily compact)

- convex domains for Clipped-SMD and  $O\left(T^{\frac{1-p}{p}}\sigma + T^{-2}\right)$  for accelerated Clipped-SMD, where  $\sigma$  is the noise parameter. These rates are time-optimal and match the lower bounds proven in [25, 30].

- In the nonconvex setting, we obtain the optimal convergence rate of  $O\left(T^{\frac{2-2p}{3p-2}}\right)$  for clipped-SGD.

This bound is also time-optimal and matches the lower bound in [32]; it also complements the in-expectation convergence of clipped-SGD provided by [32].

- Previous works for heavy-tailed noises follow the recipe of using Freedman-type inequalities [3, 2] as a *blackbox* and bound the iterates inductively for all iterations. This process incurs an additional  $\log T$  dependency in the final convergence rate; in other words, the success probability goes from  $1 - \delta$  to  $1 - T\delta$ . The step sizes and clipping parameters of this approach depend on the time horizon  $T$  to enable the union bound and induction across all iterations in the analysis, excluding the important case when the time horizon is unknown. Our whitebox approach forgoes the aforementioned induction, not only circumventing the  $\log T$  loss but also allowing for an unknown time horizon. We further show that our analysis allows for a choice of step size and clipping parameters that do not depend on generally unknown parameters like the noise-parameter  $\sigma$ , the failure probability  $\delta$ , and the initial distance to the optimum, all of which appear impossible using only the techniques from prior works.

- Our whitebox approach analyzes the moment generating function of a well chosen martingale difference sequence to obtain tight rates for stochastic gradient methods. This approach is closest to the work of [17], which only work in the light-tailed noise setting. In contrast to the light-tailed noise setting where all the moments are well controlled, the heavy-tailed setting often requires algorithms to incorporate gradient clipping for controlling the possibly infinite moments. However, this makes the gradient estimate biased and requires more careful attention to control the bias propagating

through the algorithm. Naively applying the technique in [17] is not enough to handle heavy-tailed noise. Rather, as will be shown in our analysis, we introduce a novel history-dependent weights for the martingale sequence that is able to cope with the propagating bias term of clipped methods for heavy-tailed noise across various settings.

## 1.2 Related Works

**High probability convergence for light-tailed noises.** Convergence in high probability of stochastic gradient algorithms has been established for sub-Gaussian noises in a number of prior works, including [22, 11, 26, 13, 10, 9] for convex problems with bounded domain (or bounded Bregman diameter) or with strong convexity. Other works [16, 19, 15] study convergence of variants of SGD for nonconvex objectives, where they consider sub-Gaussian and sub-Weibull noises. The most relevant to ours in this line of work is the one by [17], where a whitebox approach is employed to obtain tight rates for stochastic gradient methods in the light-tailed noise setting. However, their technique is not directly applicable in the heavy-tailed noise setting, where we need to introduce new ideas to handle the biases introduced by gradient clipping.

**High probability convergence for noises with bounded variance and heavy tails.** The design of new gradient algorithms and their analysis in the presence of heavy-tailed noises has drawn significant recent interest. Starting from the work [24] which propose Clipped-SGD to handle exploding gradients in recurrent neural networks, the recent works [29, 28, 32, 8] give new motivation for clipped methods in the context of convolutional networks and attention deep networks that attempts to explain the dominance of adaptive methods over SGD in practical modern scenarios.

While the convergence in expectation of vanilla SGD has been extensively studied [4, 22, 12, 17], only recently has the convergence of Clipped-SGD with heavy tailed noises been closely examined. There, [32] first show the convergence in expectation of Clipped-SGD for nonconvex functions and provide a matching lower bound. In the convex regime, several works with different clipping strategies for the case of  $p = 2$  have shown high probability convergence for smooth problems with bounded domain [21, 23], smooth unconstrained problems [6], and non-smooth problems [7]. A variant of Clipped-SGD that utilizes momentum [1] has also been shown to converge with high probability for bounded  $p$ th moments gradient noise. However, the analysis in [1] requires a strong assumption which implies that the true gradients are bounded, a restrictive assumption that excludes objectives like quadratic functions.

More recently, [27, 18, 33] give nearly-optimal convergence rates for several Clipped-SGD variants. These works follow the recipe of using Freedman-type inequalities [3, 2] as a blackbox and bound the iterates inductively for all iterations, which incur an additional  $\log T$  dependency in the final convergence rate. We show in our work that existing convergence rates can be tightened up and improved. Tight lower bounds for the optimal convergence rate have been shown by [25, 30] for convex objectives and by [32] for nonconvex settings. In both cases, our paper provides optimal convergence guarantees.

In a related but different line of work, [31] show that vanilla SGD can converge with heavy tailed noise for a special type of strongly convex functions, and [30] show that stochastic mirror descent converges in expectation for a special choice of mirror maps, although only for strongly convex objectives with bounded domains.

## 2 Preliminaries: Assumptions and Notations

We study the problem  $\min_{x \in \mathcal{X}} f(x)$  where  $f : \mathbb{R}^d \rightarrow \mathbb{R}$  and  $\mathcal{X}$  is the domain of the problem. In the convex setting, we assume that  $\mathcal{X}$  is a convex set but not necessarily compact. We let  $\|\cdot\|$  be an arbitrary norm and  $\|\cdot\|_*$  be its dual norm. In the nonconvex setting, we take  $\mathcal{X}$  to be  $\mathbb{R}^d$  and consider only the  $\ell_2$  norm.

### 2.1 Assumptions

Our paper works with the following assumptions:

**(1) Existence of a minimizer:** In the convex setting, we assume that there exists  $x^* \in \arg \min_{x \in \mathcal{X}} f(x)$ . We let  $f^* = f(x^*)$ .

139 **(1') Existence of a finite lower bound:** In the nonconvex setting, we assume that  $f$  admits a finite  
 140 lower bound, i.e.,  $f^* := \inf_{x \in \mathbb{R}^d} f(x) > -\infty$ .

141 **(2) Unbiased estimator:** We assume that our algorithm is allowed to query a stochastic first-order  
 142 oracle that returns a history-independent, unbiased gradient estimator  $\widehat{\nabla} f(x)$  of  $\nabla f(x)$  for any  
 143  $x \in \mathcal{X}$ . That is, conditioned on the history and the queried point  $x$ , we have  $\mathbb{E}[\widehat{\nabla} f(x) \mid x] = \nabla f(x)$ .

144 **(3) Bounded  $p$ th moment noise:** We assume that there exists  $\sigma > 0$  such that for some  $1 < p \leq 2$   
 145 and for any  $x \in \mathcal{X}$ ,  $\widehat{\nabla} f(x)$  satisfies  $\mathbb{E}[\|\widehat{\nabla} f(x) - \nabla f(x)\|_*^p \mid x] \leq \sigma^p$ .

146 **(4)  $L$ -smoothness:** We consider the class of  $L$ -smooth functions: for all  $x, y \in \mathbb{R}^d$ ,  
 147  $\|\nabla f(x) - \nabla f(y)\|_* \leq L \|x - y\|$ .

## 148 2.2 Gradient Clipping Operator and Notations

149 We introduce the gradient clipping operator and its general properties used in Clipped-SMD (Al-  
 150 gorithm 2) and Clipped-SGD (Algorithm 1). Let  $x_t$  be the output at iteration  $t$  of an algorithm of  
 151 interest. We denote by  $\widehat{\nabla} f(x_t)$  the stochastic gradient obtained by querying the gradient oracle. The  
 152 clipped gradient estimate  $\widetilde{\nabla} f(x_t)$  is taken as

$$\widetilde{\nabla} f(x_t) = \min \left\{ 1, \frac{\lambda_t}{\|\widehat{\nabla} f(x_t)\|_*} \right\} \widehat{\nabla} f(x_t), \quad (1)$$

153 where  $\lambda_t$  is the clipping parameter used in iteration  $t$ . In subsequent sections, we let  $\Delta_t := f(x_t) -$   
 154  $f^*$  denote the optimal function value gap at  $x_t$ . We let  $\mathcal{F}_t = \sigma(\widehat{\nabla} f(x_1), \dots, \widehat{\nabla} f(x_t))$  be the  
 155 natural filtration at time  $t$  and define the following notations for the stochastic error, the deviation,  
 156 and the bias of the clipped gradient estimate at time  $t$ :

$$\theta_t = \widetilde{\nabla} f(x_t) - \nabla f(x_t); \quad \theta_t^u = \widetilde{\nabla} f(x_t) - \mathbb{E}[\widetilde{\nabla} f(x_t) \mid \mathcal{F}_{t-1}]; \quad \theta_t^b = \mathbb{E}[\widetilde{\nabla} f(x_t) \mid \mathcal{F}_{t-1}] - \nabla f(x_t).$$

157 Note that  $\theta_t^u + \theta_t^b = \theta_t$ . Regardless of the convexity of the function  $f$ , the following lemma provides  
 158 upper bounds for these quantities. These bounds can be found in prior works [6, 32, 18, 27] for the  
 159 special case of  $\ell_2$  norm. The extension to the general norm follows in the same manner, which we  
 160 omit in this work.

161 **Lemma 2.1.** *For stochastic gradients  $\widehat{\nabla} f(x_t)$  with bounded  $p$ th moment noise, the clipped gradients*  
 162  *$\widetilde{\nabla} f(x_t)$  satisfy the following properties:*

$$\|\theta_t^u\|_* = \left\| \widetilde{\nabla} f(x_t) - \mathbb{E}[\widetilde{\nabla} f(x_t) \mid \mathcal{F}_{t-1}] \right\|_* \leq 2\lambda_t. \quad (2)$$

163 Furthermore, if  $\|\nabla f(x_t)\|_* \leq \frac{\lambda_t}{2}$  then

$$\|\theta_t^b\|_* = \left\| \mathbb{E}[\widetilde{\nabla} f(x_t) \mid \mathcal{F}_{t-1}] - \nabla f(x_t) \right\|_* \leq 4\sigma^p \lambda_t^{1-p}; \quad (3)$$

$$\mathbb{E}[\|\theta_t^u\|_*^2] = \mathbb{E}[\left\| \widetilde{\nabla} f(x_t) - \mathbb{E}[\widetilde{\nabla} f(x_t) \mid \mathcal{F}_{t-1}] \right\|_*^2] \leq 40\sigma^p \lambda_t^{2-p}. \quad (4)$$

164 Finally, we state a simple but important lemma that bounds the moment generating function of a  
 165 zero-mean bounded random variable. The proof can be found in, for example, Lemma 1 of [16].

166 **Lemma 2.2.** *Let  $X$  be a random variable such that  $\mathbb{E}[X] = 0$  and  $|X| \leq R$  almost surely. Then*  
 167 *for  $0 \leq \lambda \leq \frac{1}{R}$*

$$\mathbb{E}[\exp(\lambda X)] \leq \exp\left(\frac{3}{4}\lambda^2 \mathbb{E}[X^2]\right).$$

## 168 3 Clipped Stochastic Gradient Descent for Nonconvex Functions

169 In this section, we study the convergence of Clipped-SGD for nonconvex functions. Here, we con-  
 170 sider the domain to be  $\mathbb{R}^d$  equipped with the standard  $\ell_2$  norm. We first outline a blackbox concen-  
 171 tration argument to show convergence in high probability of Algorithm 1 and then follow-up with a  
 172 more powerful whitebox approach that allows for a tight high probability convergence analysis.

---

**Algorithm 1** Clipped-SGD

---

Parameters: initial point  $x_1$ , step sizes  $\{\eta_t\}$ , clipping parameters  $\{\lambda_t\}$   
for  $t = 1$  to  $T$  do

$$\begin{aligned}\tilde{\nabla} f(x_t) &= \min \left\{ 1, \frac{\lambda_t}{\|\nabla f(x_t)\|} \right\} \hat{\nabla} f(x_t) \\ x_{t+1} &= x_t - \eta_t \tilde{\nabla} f(x_t)\end{aligned}$$

---

**Comparison to previous works.** In the simple setting of known time horizon and without momentum for Clipped-SGD, the  $\tilde{O}(T^{\frac{2-2p}{3p-2}})$  convergence rate has not been shown before to the best of our knowledge. The recent work by [27] study this case and only give a suboptimal rate of  $\tilde{O}(T^{\frac{1-p}{p}})$ . Note that [1, 18] study other variants of Clipped-SGD with momentums incorporated. Although [1, 18] achieve the nearly-optimal time dependency of  $\tilde{O}(T^{\frac{2-2p}{3p-2}})$  in the non-convex settings, they rely on using blackbox concentration inequalities which result in a suboptimal convergence rate that also requires a known time horizon.

We first present the guarantee for known time horizon  $T$  via our whitebox approach in Theorem 3.1 and defer the statement for unknown  $T$  in Theorem B.2 to the appendix.

**Theorem 3.1.** Assume that  $f$  satisfies Assumption (1'), (2), (3), (4). Let  $\gamma := \max \{\log \frac{1}{\delta}; 1\}$  and  $\Delta_1 := f(x_1) - f^*$ . For known time horizon  $T$ , we choose  $\lambda_t$  and  $\eta_t$  such that

$$\begin{aligned}\lambda_t &:= \lambda := \max \left\{ \left( \frac{8\gamma}{\sqrt{L\Delta_1}} \right)^{\frac{1}{p-1}} T^{\frac{1}{3p-2}} \sigma^{\frac{p}{p-1}}; 2\sqrt{90L\Delta_1}; 32^{\frac{1}{p}} \sigma T^{\frac{1}{3p-2}} \right\} \\ \eta_t &:= \eta := \frac{\sqrt{\Delta_1} T^{\frac{1-p}{3p-2}}}{8\lambda\sqrt{L}\gamma} = \frac{\sqrt{\Delta_1}}{8\sqrt{L}\gamma} \min \left\{ \left( \frac{8\gamma}{\sqrt{L\Delta_1}} \right)^{\frac{-1}{p-1}} T^{\frac{-p}{3p-2}} \sigma^{\frac{-p}{p-1}}; \frac{T^{\frac{1-p}{3p-2}}}{2\sqrt{90L\Delta_1}}; \frac{T^{\frac{-p}{3p-2}}}{32^{1/p}\sigma} \right\}.\end{aligned}$$

Then with probability at least  $1 - \delta$

$$\begin{aligned}\frac{1}{T} \sum_{t=1}^T \|\nabla f(x_t)\|^2 &\leq 720\sqrt{\Delta_1}L\gamma \max \left\{ \left( \frac{8\gamma}{\sqrt{L\Delta_1}} \right)^{\frac{1}{p-1}} T^{\frac{2-2p}{3p-2}} \sigma^{\frac{p}{p-1}}; \right. \\ &\quad \left. 2\sqrt{90L\Delta_1} T^{\frac{1-2p}{3p-2}}; 32^{1/p} \sigma T^{\frac{2-2p}{3p-2}} \right\} = O \left( T^{\frac{2-2p}{3p-2}} \right).\end{aligned}$$

Lemma 3.2 is key and provides the starting point of the analysis. Its proof is shown in the Appendix.

**Lemma 3.2.** Assume that  $f$  satisfies Assumption (1'), (2), (3), (4) and  $\eta_t \leq \frac{1}{L}$  then for all  $t \geq 1$ ,

$$\begin{aligned}\frac{\eta_t}{2} \|\nabla f(x_t)\|^2 &\leq \Delta_t - \Delta_{t+1} + (L\eta_t^2 - \eta_t) \langle \nabla f(x_t), \theta_t^u \rangle + \frac{3\eta_t}{2} \|\theta_t^b\|^2 \\ &\quad + L\eta_t^2 \left( \|\theta_t^u\|^2 - \mathbb{E} \left[ \|\theta_t^u\|^2 \mid \mathcal{F}_{t-1} \right] \right) + L\eta_t^2 \mathbb{E} \left[ \|\theta_t^u\|^2 \mid \mathcal{F}_{t-1} \right].\end{aligned}\tag{5}$$

**Remark 3.3.** In Lemma 3.2, we decompose the RHS into appropriate terms that allow us to define a martingale. This lemma helps us understand why we can achieve a better convergence rate  $O(T^{\frac{2-2p}{3p-2}})$  here (for minimizing the norm squared of the gradient) than the best rate of  $O(T^{\frac{1-p}{p}})$  in the convex setting. We focus on the error term  $\langle \nabla f(x_t), \theta_t \rangle = \langle \nabla f(x_t), \theta_t^u \rangle + \langle \nabla f(x_t), \theta_t^b \rangle$  on the RHS of (5). Since this error contains the gradient  $\nabla f(x_t)$ , we leverage some of the gain  $\|\nabla f(x_t)\|^2$  on the LHS of 5: we use Cauchy-Schwarz to bound  $\langle \nabla f(x_t), \theta_t^b \rangle \leq \frac{1}{2} \|\nabla f(x_t)\|^2 + \frac{1}{2} \|\theta_t^b\|^2$  and use the some of the gain to absorb the first term. Then setting our parameters  $\lambda_t, \eta_t$  appropriately to balance the remaining terms helps us achieve the  $O(T^{\frac{2-2p}{3p-2}})$  rate. Contrast this to the general convex setting in the next section: the mismatch between the error term that contains the distance term  $\|x^* - x_t\|$  and the gain term that contains the function value gap  $f(x_t) - f^*$  prevents us from using the gain to absorb some of the error. Thus, this explains the convergence rate discrepancy between the convex case and the non-convex setting (see also Remark 4.6).

Before giving a sketch of our whitebox approach, we present a sketch of a blackbox argument that gives a nearly time-optimal convergence rate. This approach has an additional  $\log T$  factor in the final rate but will serve as a point of comparison for our new techniques, which will close this gap.

**Blackbox approach.** The key lies in the following lemma, which yields the near optimal  $\tilde{O}(T^{\frac{2-2p}{3p-2}})$  convergence rate of Clipped-SGD. In this case, we assume that the clipping parameters  $\lambda_t$  and the step sizes  $\eta_t$  are fixed. Note that the success probability is only  $1 - T\delta$ . This result uses Lemma 3.2 and Freedman's inequality (Theorem A.1) primarily as a *blackbox* to bound the error terms inductively by the initial function value gap to optimality.

**Lemma 3.4.** For  $1 \leq N \leq T + 1$ , let  $\eta_t = \eta$ ,  $\lambda_t = \lambda$  (the specific choices are omitted here for brevity) and  $E_N$  be the event that for all  $k = 1, \dots, N$ ,

$$L\eta^2 \sum_{t=1}^{k-1} \|\theta_t^u\|^2 + (L\eta^2 - \eta) \sum_{t=1}^{k-1} \langle \nabla f(x_t), \theta_t^u \rangle + \frac{3\eta}{2} \|\theta_t^b\|^2 \leq \Delta_1.$$

Then  $E_N$  happens with probability at least  $1 - \frac{(N-1)\delta}{T}$  for each  $N \in [T + 1]$ .

With the above lemma, we can obtain a near-optimal convergence rate. However, this rate is still suboptimal due to the use of  $T$  union bounds as part of the induction proof. We now discuss an improved analysis that closes the remaining gap.

**Whitebox approach.** Our whitebox approach defines a novel supermartingale difference sequence  $Z_t$  (shown below) and analyzes its moment generating function from first principles. The sequence is designed to leverage the structure of the problem and Clipped-SGD via carefully chosen weights  $z_t$  (shown below).

$$Z_t := z_t \left( \frac{\eta_t}{2} \|\nabla f(x_t)\|^2 + \Delta_{t+1} - \Delta_t - \frac{3\eta_t}{2} \|\theta_t^b\|^2 - L\eta_t^2 \mathbb{E} [\|\theta_t^u\|^2 \mid \mathcal{F}_{t-1}] \right) \\ - (3z_t^2 L\eta_t^2 \Delta_t + 6L^2 z_t^2 \eta_t^4 \lambda_t^2) \mathbb{E} [\|\theta_t^u\|^2 \mid \mathcal{F}_{t-1}]$$

$$\text{where } z_t := \frac{1}{2P_t \eta_t \lambda_t \max_{i \leq t} \sqrt{2L\Delta_i} + 8Q_t L\eta_t^2 \lambda_t^2}$$

for  $P_t, Q_t \in \mathcal{F}_{t-1} \geq 1$ . We also define  $S_t := \sum_{i=1}^t Z_i$ .

We now present Lemma 3.5 which is the main result for controlling the above martingale, whose proof will offer insights into the main technique in this paper. The technique to prove Lemma 3.5 is similar to the standard way of bounding the moment generating function in proving concentration inequalities, such as Freedman's inequality [3, 2]. The main challenge here is to find a way to leverage the structure of Clipped-SGD and choose the suitable coefficients  $z_t$ . Similarly to [17] where the authors analyze SGD with sub-Gaussian noise, we analyze the martingale difference sequence in a "whitebox" manner. In [17], however, thanks to the light-tailed noise, the weights  $z_t$  can be chosen depending only on the problem parameters and independently of the algorithm history. On the other hand, to use Lemma 2.2, we have to make sure that  $z_t \leq \frac{1}{R}$ , where  $R$  is an upper bound for the martingale elements. The key here is to choose  $z_t$  depending on the past iterates, and use the function value gaps  $\Delta_t$  to absorb the error incurred during the analysis. We give a proof sketch and defer the full version to the appendix.

**Lemma 3.5.** For any  $\delta > 0$ , let  $E(\delta)$  be the event that for all  $1 \leq k \leq T$

$$\frac{1}{2} \sum_{t=1}^k z_t \eta_t \|\nabla f(x_t)\|^2 + z_k \Delta_{k+1} \leq z_1 \Delta_1 + \log \frac{1}{\delta} + \sum_{t=1}^k \frac{3z_t \eta_t}{2} \|\theta_t^b\|^2 \\ + \sum_{t=1}^k \left( (3z_t^2 L\eta_t^2 \Delta_t + 6L^2 z_t^2 \eta_t^4 \lambda_t^2 + z_t L\eta_t^2) \mathbb{E} [\|\theta_t^u\|^2 \mid \mathcal{F}_{t-1}] \right).$$

Then  $\Pr[E(\delta)] \geq 1 - \delta$ .

*Proof Sketch.* Using Lemmas 3.2, 2.2, and the condition for  $z_t$ , we can show that  $\mathbb{E}[\exp(Z_t) \mid \mathcal{F}_{t-1}] \leq 1$ . This then implies

$$\mathbb{E}[\exp(S_t) \mid \mathcal{F}_{t-1}] = \exp(S_{t-1}) \mathbb{E}[\exp(Z_t) \mid \mathcal{F}_{t-1}] \leq \exp(S_{t-1}),$$

which means  $(\exp(S_t))_{t \geq 1}$  is a supermartingale. By Ville's inequality, we have, for all  $k \geq 1$ ,  $\Pr[S_k \geq \log \frac{1}{\delta}] \leq \delta \mathbb{E}[\exp(S_1)] \leq \delta$ . In other words, with probability at least  $1 - \delta$ , for all  $k \geq 1$ ,  $\sum_{t=1}^k Z_t \leq \log \frac{1}{\delta}$ . Plugging in the definition of  $Z_t$  we obtain the desired inequality.  $\square$

---

**Algorithm 2** Clipped-SMD

---

Parameters: initial point  $x_1$ , step sizes  $\{\eta_t\}$ , clipping parameters  $\{\lambda_t\}$ ,  $\psi$  is 1-strongly convex wrt  $\|\cdot\|$

for  $t = 1$  to  $T$  do

$$\tilde{\nabla} f(x_t) = \min \left\{ 1, \frac{\lambda_t}{\|\widehat{\nabla} f(x_t)\|_*} \right\} \widehat{\nabla} f(x_t)$$

$$x_{t+1} = \arg \min_{x \in \mathcal{X}} \left\{ \eta_t \langle \tilde{\nabla} f(x_t), x \rangle + \mathbf{D}_\psi(x, x_t) \right\}$$

---

237 We now specify the choice of  $\eta_t$  and  $\lambda_t$ . The following lemma gives a general condition for the  
238 choice of  $\eta_t$  and  $\lambda_t$  that gives the right convergence rate in time  $T$ .

239 **Proposition 3.6.** *We assume that the event  $E(\delta)$  from Lemma 3.5 happens. Suppose that for some*  
240  *$\ell \leq T$ , there are constants  $C_1, C_2$  and  $C_3$  such that for all  $t \leq \ell$*

241 1.  $\lambda_t \eta_t \sqrt{2L} \leq C_1$ ; 2.  $\frac{1}{L\eta_t} \left( \frac{1}{\lambda_t} \right)^p \leq C_2$ ; 3.  $\sum_{t=1}^T L \left( \frac{1}{\lambda_t} \right)^p \lambda_t^2 \eta_t^2 \leq C_3$ ; 4.  $\|\nabla f(x_t)\| \leq \frac{\lambda_t}{2}$ .

242 Then for all  $t \leq \ell + 1$

$$\frac{1}{2} \sum_{i=1}^t \eta_i \|\nabla f(x_i)\|^2 + \Delta_{t+1} \leq \left( \sqrt{\Delta_1} + 2\sqrt{AC_1} \right)^2$$

243 for a constant  $A \geq \max \left\{ 64 \left( \log \frac{1}{\delta} + \frac{60\sigma^p C_3}{C_1^2} \right)^2 + \frac{48\sigma^{2p} C_2 C_3 + 140\sigma^p C_3}{C_1^2}; 1 \right\}$ .

244 Finally, the proof for Theorem 3.1 is a direct consequence of Proposition 3.6 where we defer the  
245 details to the appendix.

## 246 4 Clipped Stochastic Mirror Descent for Convex Objectives

247 In this section, we present and analyze the Clipped Stochastic Mirror Descent algorithm (Algorithm  
248 2) under heavy-tailed noise, with a general domain and arbitrary norm. In Section D in the appendix,  
249 we also show the convergence and its analysis for Accelerated Stochastic Mirror Descent.

250 We define the Bregman divergence  $\mathbf{D}_\psi(x, y) = \psi(x) - \psi(y) - \langle \nabla \psi(y), x - y \rangle$ , where  $\psi : \mathbb{R}^d \rightarrow \mathbb{R}$   
251 is a 1-strongly convex differentiable function with respect to the norm  $\|\cdot\|$  on  $\mathcal{X}$ . We assume for  
252 convenience that  $\text{dom}(\psi) = \mathbb{R}^d$ . Algorithm 2 is a generalization of Clipped-SGD for convex  
253 functions to an arbitrary norm. The only difference from the standard Stochastic Mirror Descent  
254 algorithm is the use of the clipped gradient  $\tilde{\nabla} f(x_t)$  in place of the true stochastic gradient  $\widehat{\nabla} f(x_t)$   
255 when computing the new iterate  $x_{t+1}$ .

256 Prior works such as [6] only consider the setting where the global minimizer lies in  $\mathcal{X}$ . Our algorithm  
257 and analysis does not require this restriction and instead only uses the following initial gradient  
258 estimate assumption from [21]:

259 **(5) Initial gradient estimate:** Let  $x_1$  be the initial point. We assume that we have access to an  
260 upperbound  $\nabla_1$  of  $\|\nabla f(x_1)\|_*$  i.e.  $\|\nabla f(x_1)\|_* \leq \nabla_1$ . This assumption is justified as follows. If the  
261 noise parameter  $\sigma$  defined in assumption (3) is known, we can use the procedure of [20] to estimate  
262  $\|\nabla f(x_1)\|_*$ : we take  $O(\ln(1/\delta))$  stochastic gradient samples at  $x_1$ , and let  $g_1$  be the geometric  
263 median of these samples; we then set  $\nabla_1 := \|g_1\|_* + 10\sigma$ . It follows from [20] that  $\|\nabla f(x_1)\|_* \leq$   
264  $\nabla_1$  holds with probability at least  $1 - \delta$ . If the domain contains the global optimum  $x^*$  ( $\nabla f(x^*) = 0$ )  
265 and the initial distance  $\|x_1 - x^*\|$  is known, we have the following alternative upper bound that  
266 follows from  $\nabla f(x^*) = 0$  and smoothness:  $\|\nabla f(x_1)\|_* = \|\nabla f(x_1) - \nabla f(x^*)\|_* \leq L\|x_1 - x^*\|$ .

267 **Convergence guarantees.** We first state the convergence guarantee for this algorithm in the follow-  
268 ing Theorem 4.1 which works for an arbitrary norm and a general domain which may not include  
269 the global optimum. In this theorem, we assume that we know several problem parameters to show  
270 the main idea of our analysis. In Theorem 4.4, we remove the knowledge of the problem parameters.

271 **Theorem 4.1.** *Assume that convex  $f$  satisfies Assumptions (1), (2), (3), (4) and (5). Let  $\gamma =$   
272  $\max \{ \log \frac{1}{\delta}; 1 \}$ ;  $R_1 = \sqrt{2\mathbf{D}_\psi(x^*, x_1)}$ , and assume that  $\nabla_1$  is an upper bound of  $\|\nabla f(x_1)\|_*$ .*

For known  $T$ , we choose  $\lambda_t$  and  $\eta_t$  such that

$$\lambda_t = \lambda = \max \left\{ \left( \frac{26T}{\gamma} \right)^{1/p} \sigma; 2(3LR_1 + \nabla_1) \right\}, \text{ and}$$

$$\eta_t = \eta = \frac{R_1}{24\lambda_t\gamma} = \frac{R_1}{24\gamma} \min \left\{ \left( \frac{26T}{\gamma} \right)^{-1/p} \sigma^{-1}; \frac{1}{2}(3LR_1 + \nabla_1)^{-1} \right\}.$$

Then with probability at least  $1 - \delta$

$$\frac{1}{T} \sum_{t=2}^{T+1} \Delta_t \leq 48R_1 \max \left\{ 26^{\frac{1}{p}} T^{\frac{1-p}{p}} \sigma \gamma^{\frac{p-1}{p}}; 2(3LR_1 + \nabla_1) T^{-1} \gamma \right\} = O \left( T^{\frac{1-p}{p}} \right).$$

**Remark 4.2.** This theorem shows that the convergence rate for the known time horizon case is  $O(T^{\frac{1-p}{p}})$ . This rate is known to be optimal, matching the lower bounds shown in [25, 30]. The above guarantee is also adaptive to  $\sigma$ , i.e., when  $\sigma \rightarrow 0$ , we obtain the standard  $O(T^{-1})$  convergence rate of deterministic mirror descent.

**Remark 4.3.** The term  $\nabla_1$  in the above theorem comes from the inexact estimation of  $\|\nabla f(x_1)\|_*$ . If we assume that the global optimum lies in the domain  $\mathcal{X}$ , we can simply select  $\nabla_1 = LR_1$  without using the estimation procedure, as discussed in (5).

In Theorem 4.1, we use the initial distance  $R_1$  to the optimal solution to set the step sizes and clipping parameters. This information is generally not available, but can be avoided. For example, for constrained problems where the domain radius is bounded by  $R$ , we can replace  $R_1$  in Theorem 4.1 by  $R$  without change in the dependency. However, for the general problem, we present Theorem 4.4, where we do not require knowledge of the constants  $T, \sigma, \delta$  or  $R_1$  to set the step sizes and clipping parameters. However, we still need the mild assumption of knowing an upper bound  $\nabla_1$  on  $\|\nabla f(x_1)\|_*$ . As discussed in (5),  $\nabla_1$  can be estimated with good accuracy when  $\sigma$  is known.

**Theorem 4.4.** Assume that convex  $f$  satisfies Assumption (1), (2), (3), (4) and (5). Let  $\gamma = \max \left\{ \log \frac{1}{\delta}; 1 \right\}$ ;  $R_1 = \sqrt{2\mathbf{D}_\psi(x^*, x_1)}$ , and assume that  $\nabla_1$  is an upper bound of  $\|\nabla f(x_1)\|_*$ . We choose  $\lambda_t$  and  $\eta_t$  such that

$$\lambda_t = \max \left\{ (52t(1 + \log t)^2 c_2)^{1/p}; 2 \left( L \max_{i \leq t} \|x_i - x_1\| + \nabla_1 \right); \frac{Lc_1}{6} \right\}, \text{ and}$$

$$\eta_t = \frac{c_1}{24\lambda_t} = \frac{c_1}{24} \min \left\{ (52t(1 + \log t)^2 c_2)^{-1/p}; \frac{1}{2(L \max_{i \leq t} \|x_i - x_1\| + \nabla_1)}; \frac{6}{Lc_1} \right\},$$

where the absolute constants  $c_1$  and  $c_2$  are to ensure the correctness of the dimensions. Then, with probability at least  $1 - \delta$ , we have

$$\frac{1}{T} \sum_{t=2}^{T+1} \Delta_t \leq \frac{8}{Tc_1} \left( R_1 + \frac{c_1}{3} \left( \gamma + \frac{2\sigma^p}{c_2} \right) \right)^2 \max \left\{ (52T(1 + \log T)^2 c_2)^{1/p}; \right.$$

$$\left. 4R_1L + \frac{2c_1}{3}L \left( \gamma + \frac{2\sigma^p}{c_2} \right) + 2\nabla_1; \frac{Lc_1}{6} \right\} = \tilde{O} \left( T^{\frac{1-p}{p}} \right).$$

**Sketch of the analysis.** In the remainder of this section, we provide a sketch of the analysis for Theorem 4.1, which starts with the following lemma.

**Lemma 4.5.** Assume that convex  $f$  satisfies Assumption (1), (2), (3), (4) and  $\eta_t \leq \frac{1}{4L}$ , the iterate sequence  $(x_t)_{t \geq 1}$  output by Algorithm 2 satisfies the following:

$$\eta_t \Delta_{t+1} \leq \mathbf{D}_\psi(x^*, x_t) - \mathbf{D}_\psi(x^*, x_{t+1}) + \eta_t \langle x^* - x_t, \theta_t^u \rangle + \eta_t \langle x^* - x_t, \theta_t^b \rangle$$

$$+ 2\eta_t^2 \left( \|\theta_t^u\|_*^2 - \mathbb{E} \left[ \|\theta_t^u\|_*^2 \mid \mathcal{F}_{t-1} \right] \right) + 2\eta_t^2 \mathbb{E} \left[ \|\theta_t^u\|_*^2 \mid \mathcal{F}_{t-1} \right] + 2\eta_t^2 \|\theta_t^b\|_*^2.$$

**Remark 4.6.** In contrast to Remark 3.3, there is a mismatch between the gain  $\Delta_{t+1}$  and the loss  $\langle x^* - x_t, \theta_t \rangle$ . Since the distance  $\|x^* - x_t\|$  and the function value gap  $\Delta_t$  cannot be related in the general convex case, we do not obtain the same rate as in the nonconvex case.

301 We now define the following terms for  $t \geq 1$ :

$$Z_t := z_t \left( \eta_t \Delta_{t+1} + \mathbf{D}_\psi(x^*, x_{t+1}) - \mathbf{D}_\psi(x^*, x_t) - \eta_t \langle x^* - x_t, \theta_t^b \rangle - 2\eta_t^2 \|\theta_t^b\|_*^2 - 2\eta_t^2 \mathbb{E} \left[ \|\theta_t^u\|_*^2 \mid \mathcal{F}_{t-1} \right] \right) - \left( \frac{3}{8\lambda_t^2} + 24z_t^2 \eta_t^4 \lambda_t^2 \right) \mathbb{E} \left[ \|\theta_t^u\|^2 \mid \mathcal{F}_{t-1} \right],$$

$$\text{where } z_t := \frac{1}{2\eta_t \lambda_t \max_{i \leq t} \sqrt{2\mathbf{D}_\psi(x^*, x_i)} + 16Q\eta_t^2 \lambda_t^2}$$

302 for a constant  $Q \geq 1$ . We also define  $S_t := \sum_{i=1}^t Z_i$ . We have the following lemma, which is  
303 analogous to Lemma 3.5 in the nonconvex case.

304 **Lemma 4.7.** *For any  $\delta > 0$ , let  $E(\delta)$  be the event that for all  $1 \leq k \leq T$*

$$\begin{aligned} \sum_{t=1}^k z_t \eta_t \Delta_{t+1} + z_k \mathbf{D}_\psi(x^*, x_{k+1}) &\leq z_1 \mathbf{D}_\psi(x^*, x_1) + \log \frac{1}{\delta} + \sum_{t=1}^k z_t \eta_t \langle x^* - x_t, \theta_t^b \rangle \\ &\quad + 2 \sum_{t=1}^k z_t \eta_t^2 \|\theta_t^b\|_*^2 + \sum_{t=1}^k \left( \left( 2z_t \eta_t^2 + \frac{3}{8\lambda_t^2} + 24z_t^2 \eta_t^4 \lambda_t^2 \right) \mathbb{E} \left[ \|\theta_t^u\|_*^2 \mid \mathcal{F}_{t-1} \right] \right). \end{aligned} \quad (6)$$

305 Then  $\Pr[E(\delta)] \geq 1 - \delta$ .

306 We now specify the choice of  $\eta_t$  and  $\lambda_t$ . The following proposition gives a general condition for the  
307 choice of  $\eta_t$  and  $\lambda_t$  that gives the right convergence rate in time  $T$ .

308 **Proposition 4.8.** *We assume that the event  $E(\delta)$  from Lemma 4.7 happens. Suppose that for some  
309  $\ell \leq T$ , there are constants  $C_1, C_2, C_3$ , and  $A$  such that for all  $t \leq \ell$*

$$310 \quad 1. \lambda_t \eta_t = C_1; \quad 2. \sum_{t=1}^{\ell} \left( \frac{1}{\lambda_t} \right)^p \leq C_2; \quad 3. \left( \frac{1}{\lambda_t} \right)^{2p} \leq C_3 \left( \frac{1}{\lambda_t} \right)^p; \quad 4. \|\nabla f(x_t)\|_* \leq \frac{\lambda_t}{2}.$$

311 Then for all  $t \leq \ell + 1$

$$\sum_{i=1}^t \eta_i \Delta_{i+1} + \mathbf{D}_\psi(x^*, x_{t+1}) \leq \frac{1}{2} (R_1 + 8AC_1)^2$$

$$312 \quad \text{for } A \geq \max \left\{ \log \frac{1}{\delta} + 26\sigma^p C_2 + \frac{2\sigma^{2p} C_2 C_3}{A}; 1 \right\}.$$

313 Theorem 4.1 follows from Proposition 4.8. Both proofs can be found in the appendix.

314 **Extensions.** In Section D in the appendix, we also show the convergence and its analysis for  
315 Accelerated Stochastic Mirror Descent. Our analysis readily extends to non-smooth settings,  
316 and more generally to functions that satisfy  $f(y) - f(x) \leq \langle \nabla f(x), y - x \rangle + G \|y - x\| +$   
317  $\frac{L}{2} \|y - x\|^2$ ,  $\forall y, x \in \mathcal{X}$ . This condition is satisfied by both Lipschitz functions (when  $L = 0$ )  
318 and smooth functions (when  $G = 0$ ). The key step is to extend Lemma 4.5. The proof follows from  
319 [14] and can be found in the appendix.

## 320 5 Conclusion

321 In this work, we propose a new approach to design and analyze various clipped gradient algorithms  
322 in the presence of heavy-tailed noise. Our analysis applies to various standard settings, includ-  
323 ing Clipped-SMD and accelerated Clipped-SMD for convex objectives with general domains and  
324 Clipped-SGD for nonconvex objectives, and gives optimal high probability rates in all settings. Our  
325 algorithms allow for setting step-sizes and clipping parameters when the time horizon and problem  
326 parameters such as the initial distance are unknown. For future work, since our algorithms have  
327 the limitation of still requiring the knowledge of parameters like  $L$  and  $p$ , it is of great interest to  
328 investigate the existence of a *fully-adaptive* method, like Adagrad, that converges under heavy-tailed  
329 noise without requiring the knowledge of *any* problem parameter. Finally, it would be interesting to  
330 extend our techniques to the setting of variational inequalities under heavy-tailed noise [5].

## References

- [1] Ashok Cutkosky and Harsh Mehta. High-probability bounds for non-convex stochastic optimization with heavy tails. *Advances in Neural Information Processing Systems*, 34:4883–4895, 2021.
- [2] Kacha Dzhaparidze and JH Van Zanten. On bernstein-type inequalities for martingales. *Stochastic processes and their applications*, 93(1):109–117, 2001.
- [3] David A Freedman. On tail probabilities for martingales. *the Annals of Probability*, pages 100–118, 1975.
- [4] Saeed Ghadimi and Guanghui Lan. Stochastic first-and zeroth-order methods for nonconvex stochastic programming. *SIAM Journal on Optimization*, 23(4):2341–2368, 2013.
- [5] Eduard Gorbunov, Marina Danilova, David Dobre, Pavel Dvurechenskii, Alexander Gasnikov, and Gauthier Gidel. Clipped stochastic methods for variational inequalities with heavy-tailed noise. *Advances in Neural Information Processing Systems*, 35:31319–31332, 2022.
- [6] Eduard Gorbunov, Marina Danilova, and Alexander Gasnikov. Stochastic optimization with heavy-tailed noise via accelerated gradient clipping. *Advances in Neural Information Processing Systems*, 33:15042–15053, 2020.
- [7] Eduard Gorbunov, Marina Danilova, Innokentiy Shibaev, Pavel Dvurechensky, and Alexander Gasnikov. Near-optimal high probability complexity bounds for non-smooth stochastic optimization with heavy-tailed noise. *arXiv preprint arXiv:2106.05958*, 2021.
- [8] Mert Gurbuzbalaban, Umut Simsekli, and Lingjiong Zhu. The heavy-tail phenomenon in sgd. In *International Conference on Machine Learning*, pages 3964–3975. PMLR, 2021.
- [9] Nicholas JA Harvey, Christopher Liaw, Yaniv Plan, and Sikander Randhawa. Tight analyses for non-smooth stochastic gradient descent. In *Conference on Learning Theory*, pages 1579–1613. PMLR, 2019.
- [10] Elad Hazan and Satyen Kale. Beyond the regret minimization barrier: optimal algorithms for stochastic strongly-convex optimization. *The Journal of Machine Learning Research*, 15(1):2489–2512, 2014.
- [11] Sham M Kakade and Ambuj Tewari. On the generalization ability of online strongly convex programming algorithms. *Advances in Neural Information Processing Systems*, 21, 2008.
- [12] Ahmed Khaled and Peter Richtárik. Better theory for sgd in the nonconvex world. *arXiv preprint arXiv:2002.03329*, 2020.
- [13] Guanghui Lan. An optimal method for stochastic composite optimization. *Mathematical Programming*, 133(1):365–397, 2012.
- [14] Guanghui Lan. *First-order and stochastic optimization methods for machine learning*. Springer, 2020.
- [15] Shaojie Li and Yong Liu. High probability guarantees for nonconvex stochastic gradient descent with heavy tails. In *International Conference on Machine Learning*, pages 12931–12963. PMLR, 2022.
- [16] Xiaoyu Li and Francesco Orabona. A high probability analysis of adaptive sgd with momentum. *arXiv preprint arXiv:2007.14294*, 2020.
- [17] Zijian Liu, Ta Duy Nguyen, Thien Hang Nguyen, Alina Ene, and Huy Lê Nguyen. High probability convergence of stochastic gradient methods. *arXiv preprint arXiv:2302.14843*, 2023.
- [18] Zijian Liu, Jiawei Zhang, and Zhengyuan Zhou. Breaking the lower bound with (little) structure: Acceleration in non-convex stochastic optimization with heavy-tailed noise. *arXiv preprint arXiv:2302.06763*, 2023.

- 377 [19] Liam Madden, Emiliano Dall’Anese, and Stephen Becker. High probability convergence  
378 and uniform stability bounds for nonconvex stochastic gradient descent. *arXiv preprint*  
379 *arXiv:2006.05610*, 2020.
- 380 [20] Stanislav Minsker. Geometric median and robust estimation in banach spaces. *Bernoulli*, pages  
381 2308–2335, 2015.
- 382 [21] Alexander V Nazin, Arkadi S Nemirovsky, Alexandre B Tsybakov, and Anatoli B Juditsky.  
383 Algorithms of robust stochastic optimization based on mirror descent method. *Automation*  
384 *and Remote Control*, 80(9):1607–1627, 2019.
- 385 [22] Arkadi Nemirovski, Anatoli Juditsky, Guanghui Lan, and Alexander Shapiro. Robust stochas-  
386 tic approximation approach to stochastic programming. *SIAM Journal on optimization*,  
387 19(4):1574–1609, 2009.
- 388 [23] Daniela A Parletta, Andrea Paudice, Massimiliano Pontil, and Saverio Salzo. High prob-  
389 ability bounds for stochastic subgradient schemes with heavy tailed noise. *arXiv preprint*  
390 *arXiv:2208.08567*, 2022.
- 391 [24] Razvan Pascanu, Tomas Mikolov, and Yoshua Bengio. Understanding the exploding gradient  
392 problem. *CoRR*, *abs/1211.5063*, 2(417):1, 2012.
- 393 [25] Maxim Raginsky and Alexander Rakhlin. Information complexity of black-box convex opti-  
394 mization: A new look via feedback information theory. In *2009 47th Annual Allerton Confer-*  
395 *ence on Communication, Control, and Computing (Allerton)*, pages 803–510. IEEE, 2009.
- 396 [26] Alexander Rakhlin, Ohad Shamir, and Karthik Sridharan. Making gradient descent optimal for  
397 strongly convex stochastic optimization. *arXiv preprint arXiv:1109.5647*, 2011.
- 398 [27] Abdurakhmon Sadiev, Marina Danilova, Eduard Gorbunov, Samuel Horváth, Gauthier Gidel,  
399 Pavel Dvurechensky, Alexander Gasnikov, and Peter Richtárik. High-probability bounds for  
400 stochastic optimization and variational inequalities: the case of unbounded variance. *arXiv*  
401 *preprint arXiv:2302.00999*, 2023.
- 402 [28] Umut Şimşekli, Mert Gürbüzbalaban, Thanh Huy Nguyen, Gaël Richard, and Levent Sagun.  
403 On the heavy-tailed theory of stochastic gradient descent for deep neural networks. *arXiv*  
404 *preprint arXiv:1912.00018*, 2019.
- 405 [29] Umut Simsekli, Levent Sagun, and Mert Gurbuzbalaban. A tail-index analysis of stochastic  
406 gradient noise in deep neural networks. pages 5827–5837, 2019.
- 407 [30] Nuri Mert Vural, Lu Yu, Krishna Balasubramanian, Stanislav Volgushev, and Murat A Er-  
408 dogdu. Mirror descent strikes again: Optimal stochastic convex optimization under infinite  
409 noise variance. In *Conference on Learning Theory*, pages 65–102. PMLR, 2022.
- 410 [31] Hongjian Wang, Mert Gurbuzbalaban, Lingjiong Zhu, Umut Simsekli, and Murat A Erdogdu.  
411 Convergence rates of stochastic gradient descent under infinite noise variance. *Advances in*  
412 *Neural Information Processing Systems*, 34:18866–18877, 2021.
- 413 [32] Jingzhao Zhang, Sai Praneeth Karimireddy, Andreas Veit, Seungyeon Kim, Sashank Reddi,  
414 Sanjiv Kumar, and Suvrit Sra. Why are adaptive methods good for attention models? *Advances*  
415 *in Neural Information Processing Systems*, 33:15383–15393, 2020.
- 416 [33] Jiujia Zhang and Ashok Cutkosky. Parameter-free regret in high probability with heavy tails.  
417 In *Advances in Neural Information Processing Systems*, 2022.

## 418 A Freedman's inequality

419 **Lemma A.1** (Freedman's inequality). *Let  $(X_t)_{t \geq 1}$  be a martingale difference sequence. Assume*  
 420 *that there exists a constant  $c > 0$  such that  $|X_t| \leq c$  almost surely for all  $t \geq 1$  and define*  
 421  $\sigma_t^2 = \mathbb{E}[X_t^2 | X_{t-1}, \dots, X_1]$ . *Then for all  $b > 0$ ,  $F > 0$  and  $T \geq 1$*

$$\Pr \left[ \left| \sum_{t=1}^T X_t \right| > b \text{ and } \sum_{t=1}^T \sigma_t^2 \leq F \right] \leq 2 \exp \left( -\frac{b^2}{2F + 2cb/3} \right).$$

## 422 B Missing Proofs from Section 3

423 *Proof of Lemma 3.2.* By the smoothness of  $f$  and the update  $x_{t+1} = x_t - \frac{1}{\eta_t} \widetilde{\nabla} f(x_t)$  we have

$$\begin{aligned} & f(x_{t+1}) - f(x_t) \\ & \leq \langle \nabla f(x_t), x_{t+1} - x_t \rangle + \frac{L}{2} \|x_{t+1} - x_t\|^2 \\ & = -\eta_t \langle \nabla f(x_t), \widetilde{\nabla} f(x_t) \rangle + \frac{L\eta_t^2}{2} \|\widetilde{\nabla} f(x_t)\|^2 \\ & = -\eta_t \langle \nabla f(x_t), \theta_t + \nabla f(x_t) \rangle + \frac{L\eta_t^2}{2} \|\theta_t + \nabla f(x_t)\|^2 \\ & = -\eta_t \|\nabla f(x_t)\|^2 - \eta_t \langle \nabla f(x_t), \theta_t \rangle + \frac{L\eta_t^2}{2} \|\theta_t\|^2 + \frac{L\eta_t^2}{2} \|\nabla f(x_t)\|^2 + L\eta_t^2 \langle \nabla f(x_t), \theta_t \rangle \\ & = -\left( \eta_t - \frac{L\eta_t^2}{2} \right) \|\nabla f(x_t)\|^2 + \frac{L\eta_t^2}{2} \|\theta_t\|^2 + (L\eta_t^2 - \eta_t) \langle \nabla f(x_t), \theta_t \rangle \\ & = -\left( \eta_t - \frac{L\eta_t^2}{2} \right) \|\nabla f(x_t)\|^2 + \frac{L\eta_t^2}{2} \|\theta_t\|^2 + \underbrace{(L\eta_t^2 - \eta_t) \langle \nabla f(x_t), \theta_t^u + \theta_t^b \rangle}_{\leq 0}. \end{aligned}$$

424 Using Cauchy-Schwarz, we have  $\langle \nabla f(x_t), \theta_t^b \rangle \leq \frac{1}{2} \|\nabla f(x_t)\|^2 + \frac{1}{2} \|\theta_t^b\|^2$ . Thus, we derive

$$\begin{aligned} \Delta_{t+1} - \Delta_t & \leq -\left( \frac{2\eta_t - L\eta_t^2}{2} \right) \|\nabla f(x_t)\|^2 + \frac{L\eta_t^2}{2} \|\theta_t\|^2 + (L\eta_t^2 - \eta_t) \langle \nabla f(x_t), \theta_t^u \rangle \\ & \quad + \frac{\eta_t - L\eta_t^2}{2} \|\nabla f(x_t)\|^2 + \frac{\eta_t - L\eta_t^2}{2} \|\theta_t^b\|^2 \\ & \leq -\frac{\eta_t}{2} \|\nabla f(x_t)\|^2 + \frac{L\eta_t^2}{2} \|\theta_t\|^2 + (L\eta_t^2 - \eta_t) \langle \nabla f(x_t), \theta_t^u \rangle + \frac{\eta_t}{2} \|\theta_t^b\|^2 \\ & \leq -\frac{\eta_t}{2} \|\nabla f(x_t)\|^2 + L\eta_t^2 \|\theta_t^u\|^2 + (L\eta_t^2 - \eta_t) \langle \nabla f(x_t), \theta_t^u \rangle + \left( L\eta_t^2 + \frac{\eta_t}{2} \right) \|\theta_t^b\|^2 \\ & \leq -\frac{\eta_t}{2} \|\nabla f(x_t)\|^2 + L\eta_t^2 \|\theta_t^u\|^2 + (L\eta_t^2 - \eta_t) \langle \nabla f(x_t), \theta_t^u \rangle + \frac{3\eta_t}{2} \|\theta_t^b\|^2, \end{aligned}$$

425 where the third inequality is due to  $\|\theta_t\|^2 \leq 2\|\theta_t^u\|^2 + 2\|\theta_t^b\|^2$ , and the last inequality is due to  
 426  $\eta_t \leq \frac{1}{L}$ . Rearranging, adding, and subtracting  $\mathbb{E}[\|\theta_t^u\|^2 | \mathcal{F}_{t-1}]$ , we obtain the lemma.  $\square$

427 *Proof Sketch of 3.4.* We will prove by induction on  $N$  that  $E_N$  happens with probability at least  
 428  $1 - \frac{(N-1)\delta}{T}$ . For  $N = 1$ , the event happens with probability 1. Suppose that for some  $N \leq T$ ,  
 429  $\Pr[E_N] \geq 1 - \frac{(N-1)\delta}{T}$ . We will prove that  $\Pr[E_{N+1}] \geq 1 - \frac{N\delta}{T}$ . From the induction hypothesis  
 430 and Lemma 5, we have that for all  $k \leq N$ ,  $\Delta_k \leq 2\Delta_1$ . Since the LHS of 5 is non-negative, by  
 431 summing over  $t$  from 1 to  $N$  we have,

$$\Delta_{N+1} \leq \underbrace{(\eta - L\eta^2) \sum_{t=1}^N \langle -\nabla f(x_t), \theta_t^u \rangle}_A + \underbrace{\frac{3\eta}{2} \sum_{t=1}^N \|\theta_t^b\|^2}_B$$

$$+ \underbrace{L\eta^2 \sum_{t=1}^N \left( \|\theta_t^u\|^2 - \mathbb{E}_t \left[ \|\theta_t^u\|^2 \right] \right)}_C + \underbrace{L\eta^2 \sum_{t=1}^N \mathbb{E}_t \left[ \|\theta_t^u\|^2 \right]}_D.$$

432 The bounds for  $B$  and  $D$  are straightforward from Lemma 2.1. First, with probability 1, we have  
 433  $\|\theta_t^u\| \leq 2\lambda$ . By the smoothness of  $f$  and the fact that  $f$  is bounded below, we have  $\|\nabla f(x_t)\| \leq$   
 434  $\sqrt{2L\Delta_t}$ :

$$\begin{aligned} f(x^*) &\leq f\left(x - \frac{1}{L}\nabla f(x)\right) \leq f(x) + \left\langle \nabla f(x), x - \frac{1}{L}\nabla f(x) - x \right\rangle + \frac{1}{2L} \|\nabla f(x)\|^2 \\ &= f(x) - \frac{1}{2L} \|\nabla f(x)\|^2 \\ \implies \|\nabla f(x)\|^2 &\leq 2L(f(x) - f(x^*)). \end{aligned}$$

435 Further, when the event  $E_N$  happens, we have

$$\|\nabla f(x_t)\| \leq \sqrt{2L\Delta_t} \leq \sqrt{4L\Delta_1} \leq \frac{\lambda}{2}.$$

436 Thus, we can apply Lemma 2.1 and obtain  $\|\theta_t^b\| \leq 4\sigma^p\lambda^{1-p}$  and  $\mathbb{E}_t \left[ \|\theta_t^u\|^2 \right] \leq 40\sigma^p\lambda^{2-p}$ . To  
 437 bound  $A$  and  $C$  we use Freedman's inequality (Theorem A.1). We define, for  $t \geq 1$ , the following  
 438 random variables

$$Z_t = \begin{cases} -\nabla f(x_t) & \text{if } \Delta_t \leq 2\Delta_1 \\ 0 & \text{otherwise.} \end{cases}$$

439 Thus with probability 1,  $\|Z_t\| \leq \|\nabla f(x_t)\| \leq 2\sqrt{L\Delta_1}$ .

440 **Upperbound for  $A$ .** Instead of bounding  $A = (\eta - L\eta^2) \sum_{t=1}^N \langle -\nabla f(x_t), \theta_t^u \rangle$ , we will bound  
 441  $A' = (\eta - L\eta^2) \sum_{t=1}^N \langle Z_t, \theta_t^u \rangle$ . We check the conditions to apply Freedman's inequality. First  
 442  $\mathbb{E}_t \left[ (\eta - L\eta^2) \langle Z_t, \theta_t^u \rangle \right] = 0$ . Further, with probability 1,  $\|\theta_t^u\|^2 \leq 2\lambda$ , and  $Z_t \leq 2\sqrt{L\Delta_1}$ ,  
 443 thus  $|(\eta - L\eta^2) \langle Z_t, \theta_t^u \rangle| \leq (\eta - L\eta^2) \|Z_t\| \|\theta_t^u\| \leq 4\sqrt{L\Delta_1} (\eta - L\eta^2) \lambda \leq 4\sqrt{L\Delta_1} \eta \lambda$ . Hence,  
 444  $\{(\eta - L\eta^2) \langle Z_t, \theta_t^u \rangle\}$  is a bounded martingale difference sequence. Therefore, for constant  $a$  and  
 445  $F$  to be chosen we have

$$\begin{aligned} &\Pr \left[ \left| \sum_{t=1}^N (\eta - L\eta^2) \langle Z_t, \theta_t^u \rangle \right| > a \text{ and } \sum_{t=1}^N \mathbb{E}_t \left[ ((\eta - L\eta^2) \langle Z_t, \theta_t^u \rangle)^2 \right] \leq F \ln \frac{4T}{\delta} \right] \\ &\leq 2 \exp \left( - \frac{a^2}{2F \ln \frac{4T}{\delta} + \frac{8}{3} \sqrt{L\Delta_1} \eta \lambda a} \right) \end{aligned}$$

446 We choose  $a$  such that  $2 \exp \left( - \frac{a^2}{2F \ln \frac{4T}{\delta} + \frac{8}{3} \sqrt{L\Delta_1} \eta \lambda a} \right) = \frac{\delta}{2T}$ . Therefore with probability at least  
 447  $1 - \frac{\delta}{2T}$  we the following event happens

$$\begin{aligned} E_A = &\left\{ \text{either } A' \leq \left| \sum_{t=1}^N (\eta - L\eta^2) \langle Z_t, \theta_t^u \rangle \right| \leq a \right. \\ &\left. \text{or } \sum_{t=1}^N \mathbb{E}_t \left[ ((\eta - L\eta^2) \langle Z_t, \theta_t^u \rangle)^2 \right] > F \ln \frac{4T}{\delta} \right\} \end{aligned}$$

448 We can choose  $F$  such that under event  $E_N$ , we have  $\sum_{t=1}^N \mathbb{E}_t \left[ ((\eta - L\eta^2) \langle Z_t, \theta_t^u \rangle)^2 \right] \leq F \ln \frac{4T}{\delta}$   
 449 with probability 1. Therefore, when  $E_N \cap E_A$  happens, we have  $A = A' \leq a$ .

450 Finally, combining all the bounds for  $A, B, C, D$  using union bound we obtain the lemma.  $\square$

451 *Proof of Lemma 3.5.* We have

$$\begin{aligned}
& \mathbb{E}[\exp(Z_t) \mid \mathcal{F}_{t-1}] \exp\left((3z_t^2 L \eta_t^2 \Delta_t + 6L^2 z_t^2 \eta_t^4 \lambda_t^2) \mathbb{E}[\|\theta_t^u\|^2 \mid \mathcal{F}_{t-1}]\right) \\
& \stackrel{(a)}{\leq} \mathbb{E}\left[\exp\left(z_t \left((L\eta_t^2 - \eta_t) \langle \nabla f(x_t), \theta_t^u \rangle + L\eta_t^2 \left(\|\theta_t^u\|^2 - \mathbb{E}[\|\theta_t^u\|^2 \mid \mathcal{F}_{t-1}]\right)\right)\right) \mid \mathcal{F}_{t-1}\right] \\
& \stackrel{(b)}{\leq} \exp\left(\mathbb{E}\left[\frac{3}{4} \left(z_t \left((L\eta_t^2 - \eta_t) \langle \nabla f(x_t), \theta_t^u \rangle + L\eta_t^2 \left(\|\theta_t^u\|^2 - \mathbb{E}[\|\theta_t^u\|^2 \mid \mathcal{F}_{t-1}]\right)\right)\right)^2 \mid \mathcal{F}_{t-1}\right]\right) \\
& \stackrel{(c)}{\leq} \exp\left(\mathbb{E}\left[\frac{3}{2} z_t^2 \eta_t^2 \|\nabla f(x_t)\|^2 \|\theta_t^u\|^2 \mid \mathcal{F}_{t-1}\right] + \mathbb{E}\left[\frac{3}{2} L^2 z_t^2 \eta_t^4 \|\theta_t^u\|^4 \mid \mathcal{F}_{t-1}\right]\right) \\
& \stackrel{(d)}{\leq} \exp\left(3z_t^2 L \eta_t^2 \Delta_t \mathbb{E}[\|\theta_t^u\|^2 \mid \mathcal{F}_{t-1}] + 6L^2 z_t^2 \eta_t^4 \lambda_t^2 \mathbb{E}[\|\theta_t^u\|^2 \mid \mathcal{F}_{t-1}]\right) \\
& = \exp\left((3z_t^2 L \eta_t^2 \Delta_t + 6L^2 z_t^2 \eta_t^4 \lambda_t^2) \mathbb{E}[\|\theta_t^u\|^2 \mid \mathcal{F}_{t-1}]\right)
\end{aligned}$$

452 For (a) we use Lemma 3.2. For (b) we use Lemma 2.2. Notice that

$$\mathbb{E}[\langle \nabla f(x_t), \theta_t^u \rangle] = \mathbb{E}[\|\theta_t^u\|_*^2 - \mathbb{E}[\|\theta_t^u\|_*^2 \mid \mathcal{F}_{t-1}]] = 0,$$

453 and since  $\|\theta_t^u\| \leq 2\lambda_t$  and  $\|\nabla f(x_t)\| \leq \sqrt{2L\Delta_t}$  for an  $L$ -smooth function, we have

$$\begin{aligned}
& \left| (L\eta_t^2 - \eta_t) \langle \nabla f(x_t), \theta_t^u \rangle + L\eta_t^2 \left(\|\theta_t^u\|^2 - \mathbb{E}[\|\theta_t^u\|^2 \mid \mathcal{F}_{t-1}]\right) \right| \\
& \leq 2\eta_t \lambda_t \|\nabla f(x_t)\| + L\eta_t^2 \left(\|\theta_t^u\|^2 + \mathbb{E}[\|\theta_t^u\|^2 \mid \mathcal{F}_{t-1}]\right) \\
& \leq 2\eta_t \lambda_t \|\nabla f(x_t)\| + 8L\eta_t^2 \lambda_t^2 \\
& \leq 2\eta_t \lambda_t \sqrt{2L\Delta_t} + 8L\eta_t^2 \lambda_t^2.
\end{aligned}$$

454 Thus  $z_t \leq \frac{1}{2\eta_t \lambda_t \sqrt{2L\Delta_t} + 8L\eta_t^2 \lambda_t^2}$ . For (c) we use  $(a+b)^2 \leq 2a^2 + 2b^2$  and  $\mathbb{E}[(X - \mathbb{E}[X])^2] \leq$   
455  $\mathbb{E}[X^2]$ . For (d) we use  $\|\nabla f(x_t)\|^2 \leq 2L\Delta_t$  and  $\|\theta_t^u\| \leq 2\lambda_t$ . We obtain

$$\mathbb{E}[\exp(Z_t) \mid \mathcal{F}_{t-1}] \leq 1.$$

456 Therefore

$$\begin{aligned}
\mathbb{E}[\exp(S_t) \mid \mathcal{F}_{t-1}] &= \exp(S_{t-1}) \mathbb{E}[\exp(Z_t) \mid \mathcal{F}_{t-1}] \\
&\leq \exp(S_{t-1})
\end{aligned}$$

457 which means  $(\exp(S_t))_{t \geq 1}$  is a supermartingale. By Ville's inequality, we have, for all  $k \geq 1$

$$\Pr\left[S_k \geq \log \frac{1}{\delta}\right] \leq \delta \mathbb{E}[\exp(S_1)] \leq \delta.$$

458 In other words, with probability at least  $1 - \delta$ , for all  $k \geq 1$

$$\sum_{t=1}^k Z_t \leq \log \frac{1}{\delta}.$$

459 Plugging in the definition of  $Z_t$  we have

$$\begin{aligned}
& \frac{1}{2} \sum_{t=1}^k z_t \eta_t \|\nabla f(x_t)\|^2 + \sum_{t=1}^k (z_t \Delta_{t+1} - z_t \Delta_t) \\
& \leq \log \frac{1}{\delta} + \sum_{t=1}^k \frac{3z_t \eta_t}{2} \|\theta_t^b\|^2 \\
& \quad + \sum_{t=1}^k \left( (3z_t^2 L \eta_t^2 \Delta_t + 6L^2 z_t^2 \eta_t^4 \lambda_t^2 + z_t L \eta_t^2) \mathbb{E}[\|\theta_t^u\|^2 \mid \mathcal{F}_{t-1}] \right).
\end{aligned}$$

460 Note that we have  $z_t$  is a decreasing sequence, hence the LHS of the above inequality can be bounded  
 461 by

$$\begin{aligned} \text{LHS} &= \frac{1}{2} \sum_{t=1}^k z_t \eta_t \|\nabla f(x_t)\|^2 + z_k \Delta_{k+1} - z_1 \Delta_1 + \sum_{t=2}^k (z_{k-1} - z_k) \Delta_k \\ &\geq \frac{1}{2} \sum_{t=1}^k z_t \eta_t \|\nabla f(x_t)\|^2 + z_k \Delta_{k+1} - z_1 \Delta_1. \end{aligned}$$

462 We obtain the desired inequality. □

463 *Proof of Proposition 3.6.* We will prove by induction on  $k$  that

$$\frac{1}{2} \sum_{i=1}^k \eta_i \|\nabla f(x_i)\|^2 + \Delta_{k+1} \leq \left( \sqrt{\Delta_1} + 2\sqrt{AC_1} \right)^2.$$

464 The base case  $k = 0$  is trivial. Suppose the statement is true for all  $t \leq k \leq \ell$ . Now we show for  
 465  $k + 1$ . Recall that

$$z_t = \frac{1}{2P_t \eta_t \lambda_t \max_{i \leq t} \sqrt{2L\Delta_i} + 8Q_t L \eta_t^2 \lambda_t^2}.$$

466 Let us choose

$$\begin{aligned} P_t &= \frac{C_1}{\lambda_t \eta_t \sqrt{2L}} \geq 1 \\ Q_t &= \frac{C_1^2 \sqrt{A}}{2L \eta_t^2 \lambda_t^2} \geq 1. \end{aligned}$$

467 We have

$$z_t = \frac{1}{2C_1 \max_{i \leq t} \sqrt{\Delta_i} + 4C_1^2 \sqrt{A}}.$$

468 Now, we can notice that  $(z_t)_{t \geq 1}$  is a decreasing sequence. By the induction hypothesis  
 469  $\max_{i \leq k} \sqrt{\Delta_i} \leq \sqrt{\Delta_1} + 2\sqrt{AC_1}$ . Hence:

$$\begin{aligned} \frac{z_t}{z_k} &= \frac{2C_1 \max_{i \leq k} \sqrt{\Delta_i} + 4C_1^2 \sqrt{A}}{2C_1 \max_{i \leq t} \sqrt{\Delta_i} + 4C_1^2 \sqrt{A}} \\ &\leq \frac{2C_1 \left( \sqrt{\Delta_1} + 2\sqrt{AC_1} \right) + 4C_1^2 \sqrt{A}}{2C_1 \sqrt{\Delta_1} + 4C_1^2 \sqrt{A}} \\ &= \frac{\sqrt{\Delta_1} + 4\sqrt{AC_1}}{\sqrt{\Delta_1} + 2\sqrt{AC_1}} \leq 2. \end{aligned}$$

470 By the choice of  $\lambda_t$ , for all  $t \leq k$ ,  $\|\nabla f(x_t)\| \leq \frac{\lambda_t}{2}$ , we can apply the second part of Lemma 2.1 to  
 471 obtain

$$\begin{aligned} \|\theta_t^b\| &\leq 4\sigma^p \lambda_t^{1-p}; \\ \mathbb{E} \left[ \|\theta_t^u\|^2 \mid \mathcal{F}_{t-1} \right] &\leq 40\sigma^p \lambda_t^{2-p}. \end{aligned}$$

472 Thus,

$$\begin{aligned} &\frac{1}{2} z_k \sum_{t=1}^k \eta_t \|\nabla f(x_t)\|^2 + z_k \Delta_{k+1} \\ &\leq z_1 \Delta_1 + \log \frac{1}{\delta} + \sum_{t=1}^k \frac{3z_t \eta_t}{2} \|\theta_t^b\|^2 \end{aligned}$$

$$\begin{aligned}
& + \sum_{t=1}^k \left( (3z_t^2 L \eta_t^2 \Delta_t + 6L^2 z_t^2 \eta_t^4 \lambda_t^2 + z_t L \eta_t^2) \mathbb{E} \left[ \|\theta_t^u\|^2 \mid \mathcal{F}_{t-1} \right] \right) \\
& \leq z_1 \Delta_1 + \log \frac{1}{\delta} + 24\sigma^{2p} \sum_{t=1}^k z_t \eta_t \lambda_t^2 \left( \frac{1}{\lambda_t} \right)^{2p} \\
& \quad + 40\sigma^p \sum_{t=1}^k \left( (3z_t^2 \Delta_t + 6z_t^2 L \eta_t^2 \lambda_t^2 + z_t) L \eta_t^2 \lambda_t^2 \left( \frac{1}{\lambda_t} \right)^p \right).
\end{aligned}$$

473 Since  $\frac{z_t}{z_k} \leq 2$  we have

$$\begin{aligned}
& \frac{1}{2} \sum_{t=1}^k \eta_t \|\nabla f(x_t)\|^2 + \Delta_{k+1} \\
& \leq \frac{z_1 \Delta_1}{z_k} + \frac{1}{z_k} \log \frac{1}{\delta} + 48\sigma^{2p} \sum_{t=1}^k \eta_t \lambda_t^2 \left( \frac{1}{\lambda_t} \right)^{2p} \\
& \quad + 80\sigma^p \sum_{t=1}^k \left( (3z_t \Delta_t + 6z_t L \eta_t^2 \lambda_t^2 + 1) L \eta_t^2 \lambda_t^2 \left( \frac{1}{\lambda_t} \right)^p \right) \\
& \stackrel{(a)}{\leq} \frac{\sqrt{\Delta_1} + 4\sqrt{AC_1}}{\sqrt{\Delta_1} + 2\sqrt{AC_1}} \Delta_1 + 2C_1 \left( \sqrt{\Delta_1} + 4\sqrt{AC_1} \right) \log \frac{1}{\delta} + 48\sigma^{2p} C_2 \sum_{t=1}^k L \eta_t^2 \lambda_t^2 \left( \frac{1}{\lambda_t} \right)^p \\
& \quad + 80\sigma^p \sum_{t=1}^k \left( \left( \frac{3 \left( \sqrt{\Delta_1} + 2\sqrt{AC_1} \right)^2}{2C_1 \left( \sqrt{\Delta_1} + 2\sqrt{AC_1} \right)} + \frac{6}{8Q_t} + 1 \right) L \eta_t^2 \lambda_t^2 \left( \frac{1}{\lambda_t} \right)^p \right) \\
& \stackrel{(b)}{\leq} \Delta_1 + 2\sqrt{\Delta_1} \sqrt{AC_1} + 2C_1 \left( \sqrt{\Delta_1} + 4\sqrt{AC_1} \right) \log \frac{1}{\delta} + 48\sigma^{2p} C_2 C_3 \\
& \quad + 80\sigma^p \left( \frac{3 \left( \sqrt{\Delta_1} + 2\sqrt{AC_1} \right)}{2C_1} + \frac{7}{4} \right) C_3 \\
& \leq \Delta_1 + 2\sqrt{\Delta_1} \sqrt{AC_1} + 2C_1 \left( \sqrt{\Delta_1} + 4\sqrt{AC_1} \right) \left( \log \frac{1}{\delta} + \frac{60\sigma^p C_3}{C_1^2} \right) \\
& \quad + 48\sigma^{2p} C_2 C_3 + 140\sigma^p C_3 \\
& \stackrel{(c)}{\leq} \Delta_1 + 2\sqrt{\Delta_1} \sqrt{AC_1} + 2C_1 \left( \sqrt{\Delta_1} + 4\sqrt{AC_1} \right) \frac{\sqrt{A}}{8} + AC_1^2 \\
& \leq \left( \sqrt{\Delta_1} + 2\sqrt{AC_1} \right)^2.
\end{aligned}$$

474 For (a), we use  $\left( \frac{1}{\lambda_t} \right)^p \leq C_2 L \eta_t$  and the induction hypothesis. For (b), we use

475  $\sum_{t=1}^T L \left( \frac{1}{\lambda_t} \right)^p \lambda_t^2 \eta_t^2 \leq C_3$  and  $Q_t \geq 1$ . For (c), we have

$$\begin{aligned}
& \log \frac{1}{\delta} + \frac{60\sigma^p C_3}{C_1^2} \leq \frac{\sqrt{A}}{8} \\
& 48\sigma^{2p} C_2 C_3 + 140\sigma^p C_3 \leq AC_1^2,
\end{aligned}$$

476 since

$$A \geq 64 \left( \log \frac{1}{\delta} + \frac{60\sigma^p C_3}{C_1^2} \right)^2 + \frac{48\sigma^{2p} C_2 C_3 + 140\sigma^p C_3}{C_1^2}.$$

477 This concludes the proof.  $\square$

478 **Lemma B.1.** *The choices of  $\eta_t$  and  $\lambda_t$  in Theorem 3.1 satisfy the condition (1)-(3) of Proposition*  
 479 *3.6 for*

$$\begin{aligned} C_1 &= \frac{\sqrt{\Delta_1}}{4\sqrt{2}\gamma}, \\ C_2 &= \frac{1}{\sigma^p}, \\ C_3 &= \frac{\Delta_1}{2048\sigma^p\gamma}. \end{aligned}$$

480 *Proof.* We verify for the first case. The second follows exactly the same. First, we have  $p > 1$  hence

$$\eta_t \lambda_t \sqrt{2L} = \frac{\sqrt{\Delta_1} T^{\frac{1-p}{3p-2}}}{8\sqrt{L}\gamma} \sqrt{2L} \leq \frac{\sqrt{\Delta_1}}{4\sqrt{2}\gamma} = C_1.$$

481 Since  $\eta_t = \frac{\sqrt{\Delta_1} T^{\frac{1-p}{3p-2}}}{8\lambda_t \sqrt{L}\gamma}$ ,  $p > 1$  and  $\lambda_t \geq \left(\frac{8\gamma}{\sqrt{L}\Delta_1}\right)^{\frac{1}{p-1}} T^{\frac{1}{3p-2}} \sigma^{\frac{p}{p-1}}$

$$\begin{aligned} \eta_t \lambda_t^p &= \frac{\sqrt{\Delta_1} T^{\frac{1-p}{3p-2}}}{8\sqrt{L}\gamma} \lambda_t^{p-1} \\ &\geq \frac{\sqrt{\Delta_1} T^{\frac{1-p}{3p-2}}}{8\sqrt{L}\gamma} \frac{8\gamma}{\sqrt{L}\Delta_1} T^{\frac{p-1}{3p-2}} \sigma^p \\ &= \frac{\sigma^p}{L} \end{aligned}$$

482 which gives

$$\frac{1}{L\eta_t} \left(\frac{1}{\lambda_t}\right)^p \leq \frac{1}{\sigma^p} = C_2.$$

483 Finally, we have  $\lambda_t \geq 32^{1/p} \sigma T^{\frac{1}{3p-2}}$  hence

$$\left(\frac{1}{\lambda_t}\right)^p T^{\frac{p}{3p-2}} \leq \frac{1}{32\sigma^p}.$$

484 Therefore,

$$\begin{aligned} \sum_{t=1}^T L \left(\frac{1}{\lambda_t}\right)^p \lambda_t^2 \eta_t^2 &= \sum_{t=1}^T L \left(\frac{1}{\lambda_t}\right)^p \left(\frac{\sqrt{\Delta_1} T^{\frac{1-p}{3p-2}}}{8\sqrt{L}\gamma}\right)^2 \\ &\leq TL \left(\frac{1}{\lambda_t}\right)^p T^{\frac{2-2p}{3p-2}} \frac{\Delta_1}{64L\gamma} \\ &= \left(\frac{1}{\lambda_t}\right)^p T^{\frac{p}{3p-2}} \frac{\Delta_1}{64\gamma^2} \\ &\leq \frac{1}{32\sigma^p} \frac{\Delta_1}{64\gamma^2} \leq \frac{\Delta_1}{2048\sigma^p\gamma}. \end{aligned}$$

485 □

486 *Proof of Theorem 3.1.* Note that  $\eta \leq \frac{T^{\frac{1-p}{3p-2}}}{16\sqrt{90}L\gamma} \leq \frac{1}{L}$ . We have that with probability at least  $1 - \delta$ ,  
 487 event  $E(\delta)$  happens. Conditioning on this event, we verify the condition of Lemma 3.6. We select  
 488 the following constants

$$C_1 = \frac{\sqrt{\Delta_1}}{4\sqrt{2}\gamma}; \quad C_2 \leq \frac{1}{\sigma^p}; \quad C_3 \leq \frac{\Delta_1}{2048\sigma^p\gamma}; \quad A = 256\gamma^2.$$

489 We verify in Lemma B.1 that for these choice of constants, conditions (1)-(3) of Proposition 3.6 are  
 490 satisfied. Furthermore, we have

$$\begin{aligned} & 64 \left( \log \frac{1}{\delta} + \frac{60\sigma^p C_3}{C_1^2} \right)^2 + \frac{48\sigma^{2p} C_2 C_3 + 140\sigma^p C_3}{C_1^2} \\ &= 64 \left( \log \frac{1}{\delta} + 60 \log \frac{1}{\delta} \frac{32}{\Delta_1} \frac{\Delta_1}{2048} \right)^2 + \left( 48 \frac{\Delta_1}{2048} + 140 \frac{\Delta_1}{2048} \right) \frac{32}{\Delta_1} \\ &\leq 256\gamma^2 = A. \end{aligned}$$

491 We only need to show that, for all  $t$ ,  $\|\nabla f(x_t)\| \leq \frac{\lambda_t}{2}$ . We will show this by induction. Indeed, for  
 492 the base case we have  $\|\nabla f(x_1)\| = \sqrt{2L\Delta_1} \leq \frac{\lambda_1}{2}$ . Suppose that it is true for all  $t \leq k$ . We will  
 493 prove that  $\|\nabla f(x_{k+1})\| \leq \frac{\lambda_{k+1}}{2}$ . By Lemma 3.6 and the induction hypothesis

$$\Delta_{k+1} \leq \left( \sqrt{\Delta_1} + 2\sqrt{AC_1} \right) \leq \left( \sqrt{\Delta_1} + \frac{\sqrt{\Delta_1}}{2\sqrt{2}\gamma} \times 16\gamma \right)^2 \leq 45\Delta_1.$$

494 Thus we get

$$\|\nabla f(x_{k+1})\| = \sqrt{2L\Delta_{k+1}} \leq \sqrt{90L\Delta_1} \leq \frac{\lambda_{k+1}}{2}$$

495 as needed. From Lemma 4.7 we have

$$\frac{\eta}{2} \sum_{t=1}^T \|\nabla f(x_t)\|^2 + \Delta_{k+1} \leq 45\Delta_1.$$

496 Therefore

$$\frac{1}{T} \sum_{t=1}^T \|\nabla f(x_t)\|^2 \leq \frac{90\Delta_1}{\eta T} = 720\sqrt{\Delta_1}L\gamma \max \left\{ \left( \frac{8\gamma}{\sqrt{L\Delta_1}} \right)^{\frac{1}{p-1}} T^{\frac{2-2p}{3p-2}} \sigma^{\frac{p}{p-1}}; 2\sqrt{90L\Delta_1} T^{\frac{1-2p}{3p-2}}; 32^{\frac{1}{p}} \sigma T^{\frac{2-2p}{3p-2}} \right\}.$$

497

□

498 **Theorem B.2.** Assume that  $f$  satisfies Assumption (1'), (2), (3), (4). Let  $\gamma = \max \{ \log \frac{1}{\delta}; 1 \}$  and  
 499  $\Delta_1 = f(x_1) - f^*$ . For unknown  $T$ , we choose  $\lambda_t$  and  $\eta_t$  such that

$$\begin{aligned} \lambda_t &= \max \left\{ \left( \frac{8\gamma}{\sqrt{L\Delta_1}} \right)^{\frac{1}{p-1}} \left( 2t(1 + \log t)^2 \right)^{\frac{1}{3p-2}} \sigma^{\frac{p}{p-1}}; 2\sqrt{90L\Delta_1}; 32^{\frac{1}{p}} \sigma \left( 2t(1 + \log t)^2 \right)^{\frac{1}{3p-2}} \right\}, \\ \eta_t &= \frac{\sqrt{\Delta_1} \left( 2t(1 + \log t)^2 \right)^{\frac{1-p}{3p-2}}}{8\lambda_t \sqrt{L}\gamma}. \end{aligned}$$

500 Then with probability at least  $1 - \delta$

$$\begin{aligned} \frac{1}{T} \sum_{t=1}^T \|\nabla f(x_t)\|^2 &\leq 720\sqrt{\Delta_1}L\gamma \max \left\{ \left( \frac{8\gamma}{\sqrt{L\Delta_1}} \right)^{\frac{1}{p-1}} \left( 2(1 + \log T)^2 \right)^{\frac{p}{3p-2}} \sigma^{\frac{p}{p-1}} T^{\frac{2-2p}{3p-2}}; \right. \\ &\quad \left. 2\sqrt{90L\Delta_1} \left( 2(1 + \log T)^2 \right)^{\frac{p-1}{3p-2}} T^{\frac{1-2p}{3p-2}}; 32^{\frac{1}{p}} \sigma \left( 2(1 + \log T)^2 \right)^{\frac{p}{3p-2}} T^{\frac{2-2p}{3p-2}} \right\}. \end{aligned}$$

501 **Fact B.3.** We have  $\sum_{t=1}^{\infty} \frac{1}{2t(1+\log t)^2} < 1$ .

502 *Proof.* We use Fact B.3. Following exactly the same steps as in the case with known  $T$  and noticing  
 503 that  $\eta_t$  is decreasing, we obtain the convergence guarantee. □

## 504 C Missing Proofs from Section 4

505 **Lemma C.1.** Suppose that  $\eta_t \leq \frac{1}{4L}$  and assume  $f$  satisfies Assumption (1), (2), (3) as well as the  
 506 following condition

$$f(y) - f(x) \leq \langle \nabla f(x), y - x \rangle + G \|y - x\| + \frac{L}{2} \|y - x\|^2, \quad \forall y, x \in \mathcal{X}. \quad (7)$$

507 Then the iterate sequence  $(x_t)_{t \geq 1}$  output by Algorithm 2 satisfies the following:

$$\begin{aligned} \eta_t \Delta_{t+1} &\leq \mathbf{D}_\psi(x^*, x_t) - \mathbf{D}_\psi(x^*, x_{t+1}) + \eta_t \langle x^* - x_t, \theta_t^u \rangle + \eta_t \langle x^* - x_t, \theta_t^b \rangle \\ &\quad + 2\eta_t^2 \left( \|\theta_t^u\|_*^2 - \mathbb{E} \left[ \|\theta_t^u\|_*^2 \mid \mathcal{F}_{t-1} \right] \right) + 2\eta_t^2 \mathbb{E} \left[ \|\theta_t^u\|_*^2 \mid \mathcal{F}_{t-1} \right] + 2\eta_t^2 \|\theta_t^b\|_*^2 + 2G^2 \eta_t^2. \end{aligned}$$

508 *Proof.* By condition (7) and convexity,

$$\begin{aligned} f(x_{t+1}) - f(x^*) &\leq \underbrace{f(x_{t+1}) - f(x_t)}_{\text{condition (7)}} + \underbrace{f(x_t) - f(x^*)}_{\text{convexity}} \\ &\leq \langle \nabla f(x_t), x_{t+1} - x_t \rangle + \frac{L}{2} \|x_t - x_{t+1}\|^2 + G \|x_t - x_{t+1}\| + \langle \nabla f(x_t), x_t - x^* \rangle \\ &= \langle \nabla f(x_t), x_{t+1} - x^* \rangle + \frac{L}{2} \|x_t - x_{t+1}\|^2 + G \|x_t - x_{t+1}\| \\ &= \langle \theta_t, x^* - x_{t+1} \rangle + \left\langle \tilde{\nabla} f(x_t), x_{t+1} - x^* \right\rangle + \frac{L}{2} \|x_t - x_{t+1}\|^2 + G \|x_t - x_{t+1}\|. \end{aligned}$$

509 By the optimality condition, we have

$$\left\langle \eta_t \tilde{\nabla} f(x_t) + \nabla_x \mathbf{D}_\psi(x_{t+1}, x_t), x^* - x_{t+1} \right\rangle \geq 0$$

510 and thus

$$\left\langle \eta_t \tilde{\nabla} f(x_t), x_{t+1} - x^* \right\rangle \leq \langle \nabla_x \mathbf{D}_\psi(x_{t+1}, x_t), x^* - x_{t+1} \rangle.$$

511 Note that

$$\begin{aligned} \langle \nabla_x \mathbf{D}_\psi(x_{t+1}, x_t), x^* - x_{t+1} \rangle &= \langle \nabla \psi(x_{t+1}) - \nabla \psi(x_t), x^* - x_{t+1} \rangle \\ &= \mathbf{D}_\psi(x^*, x_t) - \mathbf{D}_\psi(x_{t+1}, x_t) - \mathbf{D}_\psi(x^*, x_{t+1}). \end{aligned}$$

512 Thus

$$\begin{aligned} \eta_t \left\langle \tilde{\nabla} f(x_t), x_{t+1} - x^* \right\rangle &\leq \mathbf{D}_\psi(x^*, x_t) - \mathbf{D}_\psi(x^*, x_{t+1}) - \mathbf{D}_\psi(x_{t+1}, x_t) \\ &\leq \mathbf{D}_\psi(x^*, x_t) - \mathbf{D}_\psi(x^*, x_{t+1}) - \frac{1}{2} \|x_{t+1} - x_t\|^2, \end{aligned}$$

513 where we have used that  $\mathbf{D}_\psi(x_{t+1}, x_t) \geq \frac{1}{2} \|x_{t+1} - x_t\|^2$  by the strong convexity of  $\psi$ .

514 Combining the two inequalities, and using the assumption that  $L\eta_t \leq \frac{1}{4}$ , we obtain

$$\begin{aligned} \eta_t \Delta_{t+1} + \mathbf{D}_\psi(x^*, x_{t+1}) - \mathbf{D}_\psi(x^*, x_t) &\leq \eta_t \langle \theta_t, x^* - x_{t+1} \rangle + \frac{L\eta_t}{2} \|x_t - x_{t+1}\|^2 + G\eta_t \|x_t - x_{t+1}\| - \frac{1}{2} \|x_{t+1} - x_t\|^2 \\ &\leq \eta_t \langle \theta_t, x^* - x_t \rangle + \eta_t \langle \theta_t, x_t - x_{t+1} \rangle - \frac{3}{8} \|x_{t+1} - x_t\|^2 + G\eta_t \|x_t - x_{t+1}\| \\ &\leq \eta_t \langle \theta_t, x^* - x_t \rangle + \eta_t^2 \|\theta_t\|_*^2 + 2G^2 \eta_t^2 \\ &\leq \eta_t \langle \theta_t^u + \theta_t^b, x^* - x_t \rangle + 2\eta_t^2 \|\theta_t^u\|_*^2 + 2\eta_t^2 \|\theta_t^b\|_*^2 + 2G^2 \eta_t^2. \end{aligned}$$

515 This is what we want to show. □

516 *Proof of Lemma 4.7.* We have

$$\begin{aligned}
& \mathbb{E} [\exp(Z_t) \mid \mathcal{F}_{t-1}] \times \exp \left( \left( \frac{3}{8\lambda_t^2} + 24z_t^2\eta_t^4\lambda_t^2 \right) \mathbb{E} [\|\theta_t^u\|_*^2 \mid \mathcal{F}_{t-1}] \right) \\
& \stackrel{(a)}{\leq} \mathbb{E} \left[ \exp \left( z_t \left( \eta_t \langle x^* - x_t, \theta_t^u \rangle + 2\eta_t^2 \left( \|\theta_t^u\|_*^2 - \mathbb{E} [\|\theta_t^u\|_*^2 \mid \mathcal{F}_{t-1}] \right) \right) \right) \mid \mathcal{F}_{t-1} \right] \\
& \stackrel{(b)}{\leq} \exp \left( \mathbb{E} \left[ \frac{3}{4} \left( z_t \left( \eta_t \langle x^* - x_t, \theta_t^u \rangle + 2\eta_t^2 \left( \|\theta_t^u\|_*^2 - \mathbb{E} [\|\theta_t^u\|_*^2 \mid \mathcal{F}_{t-1}] \right) \right) \right)^2 \mid \mathcal{F}_{t-1} \right] \right) \\
& \stackrel{(c)}{\leq} \exp \left( \left( \frac{3}{2} z_t^2 \eta_t^2 \|x^* - x_t\|^2 \mathbb{E} [\|\theta_t^u\|_*^2 \mid \mathcal{F}_{t-1}] + 6z_t^2\eta_t^4\mathbb{E} [\|\theta_t^u\|_*^4 \mid \mathcal{F}_{t-1}] \right) \right) \\
& \stackrel{(d)}{\leq} \exp \left( \left( \frac{3}{2} z_t^2 \eta_t^2 \|x^* - x_t\|^2 + 24z_t^2\eta_t^4\lambda_t^2 \right) \mathbb{E} [\|\theta_t^u\|_*^2 \mid \mathcal{F}_{t-1}] \right) \\
& \stackrel{(e)}{\leq} \exp \left( \left( \frac{3}{8\lambda_t^2} + 24z_t^2\eta_t^4\lambda_t^2 \right) \mathbb{E} [\|\theta_t^u\|_*^2 \mid \mathcal{F}_{t-1}] \right).
\end{aligned}$$

517 For (a), we use Lemma 4.5. For (b), we use Lemma 2.2. Notice that

$$\mathbb{E} [\langle x^* - x_t, \theta_t^u \rangle] = \mathbb{E} [\|\theta_t^u\|_*^2 - \mathbb{E} [\|\theta_t^u\|_*^2 \mid \mathcal{F}_{t-1}]] = 0,$$

518 and since  $\|\theta_t^u\|_* \leq 2\lambda_t$ , we have

$$\begin{aligned}
& \left| \eta_t \langle x^* - x_t, \theta_t^u \rangle + 2\eta_t^2 \left( \|\theta_t^u\|_*^2 - \mathbb{E} [\|\theta_t^u\|_*^2 \mid \mathcal{F}_{t-1}] \right) \right| \\
& \leq \eta_t \|x^* - x_t\| \|\theta_t^u\|_* + 2\eta_t^2 \left( \|\theta_t^u\|_*^2 + \mathbb{E} [\|\theta_t^u\|_*^2 \mid \mathcal{F}_{t-1}] \right) \\
& \leq 2\eta_t \lambda_t \|x^* - x_t\| + 16\eta_t^2 \lambda_t^2 \\
& \leq 2\eta_t \lambda_t \sqrt{2\mathbf{D}_\psi(x^*, x_t)} + 16\eta_t^2 \lambda_t^2.
\end{aligned}$$

519 Thus,  $z_t \leq \frac{1}{2\eta_t \lambda_t \sqrt{2\mathbf{D}_\psi(x^*, x_t)} + 16\eta_t^2 \lambda_t^2}$ . For (c), we use the inequalities  $(a+b)^2 \leq 2a^2 + 2b^2$  and

520  $\mathbb{E} [(X - \mathbb{E}[X])^2] \leq \mathbb{E}[X^2]$ . For (e), we use the fact that  $\|\theta_t^u\|_* \leq 2\lambda_t$  and

$$z_t \eta_t \|x^* - x_t\| \leq \frac{\eta_t \|x^* - x_t\|}{2\eta_t \lambda_t \sqrt{2\mathbf{D}_\psi(x^*, x_t)}} \leq \frac{1}{2\lambda_t}.$$

521 We obtain  $\mathbb{E} [\exp(Z_t) \mid \mathcal{F}_{t-1}] \leq 1$ . Therefore

$$\mathbb{E} [\exp(S_t) \mid \mathcal{F}_{t-1}] = \exp(S_{t-1}) \mathbb{E} [\exp(Z_t) \mid \mathcal{F}_{t-1}] \leq \exp(S_{t-1}).$$

522 which means  $(\exp(S_t))_{t \geq 1}$  is a supermartingale. By Ville's inequality, we have, for all  $k \geq 1$

$$\Pr \left[ S_k \geq \log \frac{1}{\delta} \right] \leq \delta \mathbb{E} [\exp(S_1)] \leq \delta.$$

523 In other words, with probability at least  $1 - \delta$ , for all  $k \geq 1$

$$\sum_{t=1}^k Z_t \leq \log \frac{1}{\delta}.$$

524 Plugging in the definition of  $Z_t$  we have

$$\begin{aligned}
& \sum_{t=1}^k z_t \eta_t \Delta_{t+1} + \sum_{t=1}^k (z_t \mathbf{D}_\psi(x^*, x_{t+1}) - z_t \mathbf{D}_\psi(x^*, x_t)) \\
& \leq \log \frac{1}{\delta} + \sum_{t=1}^k z_t \eta_t \langle x^* - x_t, \theta_t^b \rangle + 2 \sum_{t=1}^k z_t \eta_t^2 \|\theta_t^b\|_*^2 \\
& \quad + \sum_{t=1}^k \left( \left( 2z_t \eta_t^2 + \frac{3}{8\lambda_t^2} + 24z_t^2 \eta_t^4 \lambda_t^2 \right) \mathbb{E} [\|\theta_t^u\|_*^2 \mid \mathcal{F}_{t-1}] \right).
\end{aligned}$$

525 Note that we have  $z_t$  is a decreasing sequence, hence the LHS of the above inequality can be bounded  
 526 by

$$\begin{aligned} \text{LHS} &= \sum_{t=1}^k z_t \eta_t \Delta_{t+1} + z_k \mathbf{D}_\psi(x^*, x_{k+1}) - z_1 \mathbf{D}_\psi(x^*, x_1) + \sum_{t=2}^k (z_{k-1} - z_k) \mathbf{D}_\psi(x^*, x_k) \\ &\geq \sum_{t=1}^k z_t \eta_t \Delta_{t+1} + z_k \mathbf{D}_\psi(x^*, x_{k+1}) - z_1 \mathbf{D}_\psi(x^*, x_1). \end{aligned}$$

527 We obtain from here the desired inequality.  $\square$

528 *Proof of Proposition 4.8.* We will prove by induction that on  $k$

$$\sum_{i=1}^k \eta_i \Delta_{i+1} + \mathbf{D}_\psi(x^*, x_{k+1}) \leq \frac{1}{2} (R_1 + 8AC_1)^2.$$

529 The base case  $k = 0$  is trivial. We have  $\mathbf{D}_\psi(x^*, x_1) = \frac{R_1^2}{2}$ . Suppose the statement is true for all  
 530  $t \leq k \leq \ell$ . Now, we show for  $k + 1$ . Recall that

$$z_t = \frac{1}{2\eta_t \lambda_t \max_{i \leq t} \sqrt{2\mathbf{D}_\psi(x^*, x_i)} + 16Q\eta_t^2 \lambda_t^2}.$$

531 Let us choose  $Q = A > 1$ . By the induction hypothesis, we have  $\max_{i \leq t} \sqrt{2\mathbf{D}_\psi(x^*, x_i)} \leq$   
 532  $R_1 + 8AC_1$ , which implies

$$z_k \geq \frac{1}{2\eta_k \lambda_k (R_1 + 8AC_1) + 16A\eta_k^2 \lambda_k^2} = \frac{1}{2C_1 (R_1 + 16AC_1)}.$$

533 For an upperbound, since  $\sqrt{2\mathbf{D}_\psi(x^*, x_1)} = R_1$ , we have:

$$z_t \leq \frac{1}{2C_1 (R_1 + 8AC_1)}.$$

534 Since  $z_k$  is a decreasing sequence, we have

$$\begin{aligned} z_k \sum_{t=1}^k \eta_t \Delta_{t+1} + z_k \mathbf{D}_\psi(x^*, x_{k+1}) &\leq z_1 \mathbf{D}_\psi(x^*, x_1) + \log \frac{1}{\delta} + \sum_{t=1}^k z_t \eta_t \langle x^* - x_t, \theta_t^b \rangle + 2 \sum_{t=1}^k z_t \eta_t^2 \|\theta_t^b\|_*^2 \\ &\quad + \sum_{t=1}^k \left( \left( 2z_t \eta_t^2 + \frac{3}{8\lambda_t^2} + 24z_t^2 \eta_t^4 \lambda_t^2 \right) \mathbb{E} \left[ \|\theta_t^u\|_*^2 \mid \mathcal{F}_{t-1} \right] \right). \end{aligned}$$

535 By the choice of  $\lambda_t$ , for all  $t \leq k$ ,  $\|\nabla f(x_t)\|_* \leq \frac{\lambda_t}{2}$ , we can apply Lemma 2.1 and have

$$\begin{aligned} \|\theta_t^b\|_* &\leq 4\sigma^p \lambda_t^{1-p}; \\ \mathbb{E} \left[ \|\theta_t^u\|_*^2 \mid \mathcal{F}_{t-1} \right] &\leq 40\sigma^p \lambda_t^{2-p}. \end{aligned}$$

536 Thus, we have

$$\begin{aligned} &z_k \sum_{t=1}^k \eta_t \Delta_{t+1} + z_k \mathbf{D}_\psi(x^*, x_{k+1}) \\ &\leq z_1 \mathbf{D}_\psi(x^*, x_1) + \log \frac{1}{\delta} + 4 \sum_{t=1}^k z_t \eta_t \sigma^p \lambda_t^{1-p} \sqrt{2\mathbf{D}_\psi(x^*, x_t)} + 32 \sum_{t=1}^k z_t \eta_t^2 \sigma^{2p} \lambda_t^{2-2p} \\ &\quad + 40 \sum_{t=1}^k \left( \left( 2z_t \eta_t^2 + \frac{3}{8\lambda_t^2} + 24z_t^2 \eta_t^4 \lambda_t^2 \right) \sigma^p \lambda_t^{2-p} \right) \\ &\leq z_1 \mathbf{D}_\psi(x^*, x_1) + \log \frac{1}{\delta} + \frac{2C_1 (R_1 + 8AC_1) \sigma^p}{C_1 (R_1 + 8AC_1)} \sum_{t=1}^k \left( \frac{1}{\lambda_t} \right)^p + \frac{16C_1^2 \sigma^{2p}}{C_1 (R_1 + 8AC_1)} \sum_{t=1}^k \left( \frac{1}{\lambda_t} \right)^{2p} \end{aligned}$$

$$\begin{aligned}
& + 40 \left( \frac{C_1^2}{C_1(R_1 + 8AC_1)} + \frac{3}{8} + \frac{6C_1^4}{C_1^2(R_1 + 8AC_1)^2} \right) \sigma^p \sum_{t=1}^k \left( \frac{1}{\lambda_t} \right)^p \\
& \leq \frac{R_1^2}{4(C_1R_1 + 8AC_1^2)} + \log \frac{1}{\delta} + 2\sigma^p C_2 + \frac{2\sigma^{2p} C_2 C_3}{A} + 24\sigma^p C_2 \\
& \leq \frac{R_1^2}{4(C_1R_1 + 8AC_1^2)} + A,
\end{aligned}$$

537 where for the last inequality we use  $\sum_{t=1}^k \left( \frac{1}{\lambda_t} \right)^p \leq C_2$  and  $\left( \frac{1}{\lambda_t} \right)^{2p} \leq C_3 \left( \frac{1}{\lambda_t} \right)^p$ . We obtain

$$\begin{aligned}
\sum_{t=1}^k \eta_t \Delta_{t+1} + \mathbf{D}_\psi(x^*, x_{k+1}) & \leq 2C_1(R_1 + 16AC_1) \left( \frac{R_1^2}{4(C_1R_1 + 8AC_1^2)} + A \right) \\
& = \frac{1}{2}R_1^2 + \frac{4AC_1^2R_1^2}{C_1R_1 + 8AC_1^2} + 2A(C_1R_1 + 16AC_1^2) \\
& \leq \frac{1}{2}R_1^2 + 6AC_1R_1 + 32A^2C_1^2 \\
& \leq \frac{1}{2}(R_1 + 8AC_1)^2.
\end{aligned}$$

538 □

539 *Proof of Theorem 4.1.* Note that our choice of  $\eta$  ensures  $\eta \leq \frac{R_1}{16} \frac{1}{4LR_1} \leq \frac{1}{4L}$ . We have that with  
540 probability at least  $1 - \delta$ , event  $E(\delta)$  happens. Conditioning on this event, in 4.8 we choose

$$C_1 = \frac{R_1}{24\gamma}; \quad C_2 = \frac{\gamma}{26\sigma^p}; \quad C_3 = \frac{\gamma}{26T\sigma^p}; \quad A = 3\gamma.$$

541 We have

$$\begin{aligned}
\lambda_t \eta_t & = C_1 \\
\sum_{t=1}^T \left( \frac{1}{\lambda_t} \right)^p & \leq \sum_{t=1}^T \left( \frac{\gamma}{26T} \right) \frac{1}{\sigma^p} = C_2 \\
\left( \frac{1}{\lambda_t} \right)^{2p} & \leq \frac{1}{\sigma^p} \left( \frac{\gamma}{26T} \right) \left( \frac{1}{\lambda_t} \right)^p = C_3 \left( \frac{1}{\lambda_t} \right)^p \\
\max \left\{ \log \frac{1}{\delta} + 26\sigma^p C_2 + \frac{2\sigma^{2p} C_2 C_3}{A}; 1 \right\} & \leq 3\gamma = A.
\end{aligned}$$

542 We only need to show that for all  $t$

$$\|\nabla f(x_t)\|_* \leq \frac{\lambda_t}{2}.$$

543 We will show this by induction. Indeed, we have

$$\|\nabla f(x_1)\|_* \leq \nabla_1 \leq \frac{\lambda_1}{2}.$$

544 Suppose that it is true for all  $t \leq k$ . We prove that

$$\|\nabla f(x_{k+1})\|_* \leq \frac{\lambda_{k+1}}{2}.$$

545 By 4.8 we have

$$\|x_{k+1} - x^*\| \leq \sqrt{2\mathbf{D}_\psi(x^*, x_{k+1})} \leq R_1 + 8AC_1 = 2R_1.$$

546 Thus

$$\|\nabla f(x_{k+1})\|_* \leq \|\nabla f(x_{k+1}) - \nabla f(x^*)\|_* + \|\nabla f(x_1) - \nabla f(x^*)\|_* + \|\nabla f(x_1)\|_*$$

$$\begin{aligned} &\leq L \|x_{k+1} - x^*\| + L \|x_1 - x^*\| + \nabla_1 \\ &\leq 3LR_1 + \nabla_1 \leq \frac{\lambda_{k+1}}{2} \end{aligned}$$

as needed. Therefore from Lemma 4.7 we have

$$\eta \sum_{t=1}^T \Delta_{t+1} + \mathbf{D}_\psi(x^*, x_{T+1}) \leq 2R_1^2,$$

which gives

$$\frac{1}{T} \sum_{t=2}^{T+1} \Delta_t \leq \frac{2R_1^2}{\eta} = 48R_1 \max \left\{ 26^{\frac{1}{p}} T^{\frac{1-p}{p}} \sigma \gamma^{\frac{p-1}{p}}; 2(3LR_1 + \nabla_1) T^{-1} \gamma \right\}.$$

□

**Theorem C.2.** Assume that  $f$  satisfies Assumption (1), (2), (3), (4) and (5). Let  $\gamma = \max \left\{ \log \frac{1}{\delta}; 1 \right\}$ ;  $R_1 = \sqrt{2\mathbf{D}_\psi(x^*, x_1)}$  assume that  $\nabla_1$  is an upper bound of  $\|\nabla f(x_1)\|_*$ . For unknown  $T$ , we choose

$$\begin{aligned} \lambda_t &= \max \left\{ \left( \frac{52t(1 + \log t)^2}{\gamma} \right)^{1/p} \sigma; 2(3LR_1 + \nabla_1) \right\}, \text{ and} \\ \eta_t &= \frac{R_1}{24\lambda_t\gamma} = \frac{R_1}{24\gamma} \min \left\{ \left( \frac{52t(1 + \log t)^2}{\gamma} \right)^{-1/p} \sigma^{-1}; \frac{1}{2}(3LR_1 + \nabla_1)^{-1} \right\}. \end{aligned}$$

Then with probability at least  $1 - \delta$

$$\frac{1}{T} \sum_{t=2}^{T+1} \Delta_t \leq 48R_1 \max \left\{ 52^{\frac{1}{p}} T^{\frac{1-p}{p}} (1 + \log T)^{\frac{2}{p}} \sigma \gamma^{\frac{p-1}{p}}; 2(3LR_1 + \nabla_1) T^{-1} \gamma \right\} = \tilde{O} \left( T^{\frac{1-p}{p}} \right).$$

*Proof.* We can follow the similar steps. Notice that  $(\eta_t)$  is a decreasing sequence. We also use Fact B.3 to verify the second condition of Proposition 4.8. The proof is omitted. □

*Proof of Theorem 4.4.* Note that  $\eta_t \leq \frac{1}{4L}$ . We have that with probability at least  $1 - \delta$ , event  $E(\delta)$  happens. Conditioning on this event, in 4.8. We choose

$$C_1 = \frac{c_1}{24}; \quad C_2 = \frac{1}{26c_2}; \quad C_3 = \frac{1}{52c_2}; \quad A = \gamma + \frac{2\sigma^p}{c_2}.$$

We verify the conditions of Proposition 4.8

$$\begin{aligned} \lambda_t \eta_t &= C_1 \\ \sum_{t=1}^T \left( \frac{1}{\lambda_t} \right)^p &\leq \sum_{t=1}^T \frac{1}{52t(1 + \log t)^2 c_2} \leq \frac{1}{26c_2} = C_2 \\ \left( \frac{1}{\lambda_t} \right)^{2p} &\leq \frac{1}{52tc_2} \left( \frac{1}{\lambda_t} \right)^p \leq C_3 \left( \frac{1}{\lambda_t} \right)^p \\ \max \left\{ \log \frac{1}{\delta} + 26\sigma^p C_2 + \frac{2\sigma^{2p} C_2 C_3}{A}; 1 \right\} &= \max \left\{ \log \frac{1}{\delta} + \frac{\sigma^p}{c_2} + \frac{\sigma^p}{c_2}; 1 \right\} \leq A, \end{aligned}$$

where we have  $\frac{2\sigma^{2p} C_2 C_3}{A} \leq 2\sigma^{2p} C_2 C_3 \times \frac{c_2}{2\sigma^p} \leq \frac{\sigma^p}{c_2}$ . Also, note that

$$\begin{aligned} \|\nabla f(x_t)\|_* &\leq \|\nabla f(x_t) - \nabla f(x_1)\|_* + \|\nabla f(x_1)\|_* \\ &\leq L \|x_t - x_1\|_* + \|\nabla f(x_1)\|_* \leq \frac{\lambda_t}{2}. \end{aligned}$$

Therefore, from Lemma 4.7, we have

$$\eta_T \sum_{t=1}^T \Delta_{t+1} + \mathbf{D}_\psi(x^*, x_{T+1}) \leq \frac{1}{2} (R_1 + 8AC_1)^2$$

---

**Algorithm 3** Clipped-ASMD

---

Parameters: initial point  $y_1 = z_1$ , step sizes  $\{\eta_t\}$ , clipping parameters  $\{\lambda_t\}$ , and mirror map  $\psi$ , where  $\psi$  is 1-strongly convex wrt  $\|\cdot\|$ .

For  $t = 1$  to  $T$  do:

    Set  $\alpha_t = \frac{2}{t+1}$ .

$x_t = (1 - \alpha_t) y_t + \alpha_t z_t$ .

$\tilde{\nabla} f(x_t) = \min \left\{ 1, \frac{\lambda_t}{\|\widehat{\nabla} f(x_t)\|_*} \right\} \widehat{\nabla} f(x_t)$ .

$z_{t+1} = \arg \min_{x \in \mathcal{X}} \left\{ \eta_t \langle \tilde{\nabla} f(x_t), x \rangle + \mathbf{D}_\psi(x, z_t) \right\}$ .

$y_{t+1} = (1 - \alpha_t) y_t + \alpha_t z_{t+1}$ .

---

$$= \frac{1}{2} \left( R_1 + \frac{c_1}{3} \left( \gamma + \frac{2\sigma^p}{c_2} \right) \right)^2$$

560 which gives

$$\begin{aligned} \frac{1}{T} \sum_{t=2}^{T+1} \Delta_t &\leq \frac{1}{2T\eta_T} \left( R_1 + \frac{c_1}{3} \left( \gamma + \frac{2\sigma^p}{c_2} \right) \right)^2 \\ &= \frac{8}{Tc_1} \left( R_1 + \frac{c_1}{3} \left( \gamma + \frac{2\sigma^p}{c_2} \right) \right)^2 \max \left\{ (52T(1 + \log T)^2 c_2)^{1/p}; 2 \left( L \max_{i \leq T} \|x_i - x_1\| + \nabla_1 \right); \frac{L}{8} \right\}. \end{aligned}$$

561 Note that

$$\begin{aligned} \|x_i - x_1\| &\leq \|x_i - x^*\| + \|x_1 - x^*\| \\ &\leq 2R_1 + \frac{c_1}{3} \left( \gamma + \frac{2\sigma^p}{c_2} \right) \end{aligned}$$

562 which gives us the final convergence rate.  $\square$

## 563 D Clipped Accelerated Stochastic Mirror Descent

564 In this section, we extend the analysis of Clipped-SMD to the case of Clipped Accelerated Stochastic  
565 Mirror Descent (Algorithm 3). We will see that the analysis is basically the same with little mod-  
566 ification. We present in Algorithm 3 the clipped version of accelerated stochastic mirror descent  
567 (see [14]), where the clipped gradient  $\tilde{\nabla} f(x_t)$  is used to update the iterates in place of the stochastic  
568 gradient  $\widehat{\nabla} f(x_t)$ .

569 We use the following additional assumption:

570 **(5') Global minimizer:** We assume that  $\nabla f(x^*) = 0$ .

571 In other words, we assume that the global minimizer lies in the domain of the problem. This as-  
572 sumption is consistent with the works of [6, 27].

573 **Theorem D.1.** Assume that  $f$  satisfies Assumption (1), (2), (3), (4) and (5'). Let  $\gamma =$   
574  $\max \left\{ \log \frac{1}{\delta}; 1 \right\}$ ; and  $R_1 = \sqrt{2\mathbf{D}_\psi(x^*, x_1)}$ .

575 1. For known  $T$ , we choose a constant  $c$  and  $\lambda_t$  and  $\eta_t$  such that

$$\begin{aligned} c &= \max \left\{ 10^4; \frac{4(T+1) \left( \frac{26T}{\gamma} \right)^{\frac{1}{p}} \sigma}{\gamma L R_1} \right\}, \\ \lambda_t &= \frac{c R_1 \gamma L \alpha_t}{8} = \max \left\{ \frac{10^4 R_1 \gamma L}{6(t+1)}; \frac{T+1}{t+1} \left( \frac{26T}{\gamma} \right)^{1/p} \sigma \right\}, \\ \eta_t &= \frac{1}{3c\gamma^2 L \alpha_t} = \frac{R_1}{24\gamma} \min \left\{ \frac{4(t+1)}{10^4 R_1 \gamma L}; \frac{t+1}{T+1} \left( \frac{26T}{\gamma} \right)^{-1/p} \sigma^{-1} \right\}. \end{aligned}$$

576 Then with probability at least  $1 - \delta$

$$f(y_{T+1}) - f(x^*) \leq 6 \max \left\{ 10^4 L \gamma^2 R_1^2 (T+1)^{-2}; 4R_1 (T+1)^{-1} (26T)^{\frac{1}{p}} \gamma^{\frac{p-1}{p}} \sigma \right\}.$$

577 2. For unknown  $T$ , we choose  $c_t$ ,  $\lambda_t$  and  $\eta_t$  such that

$$\begin{aligned} c_t &= \max \left\{ 10^4; \frac{4(t+1) \left( \frac{52t(1+\log t)^2}{\gamma} \right)^{\frac{1}{p}} \sigma}{\gamma L R_1} \right\}, \\ \lambda_t &= \frac{c_t R_1 \gamma L \alpha_t}{8} = \max \left\{ \frac{10^4 R_1 \gamma L}{4(t+1)}; \left( \frac{52t(1+\log t)^2}{\gamma} \right)^{1/p} \sigma \right\}, \\ \eta_t &= \frac{1}{3c_t \gamma^2 L \alpha_t} = \frac{R_1}{24\gamma} \min \left\{ \frac{4(t+1)}{10^4 R_1 \gamma L}; \left( \frac{52t(1+\log t)^2}{\gamma} \right)^{-1/p} \sigma^{-1} \right\}. \end{aligned}$$

578 Then with probability at least  $1 - \delta$

$$f(y_{T+1}) - f(x^*) \leq 6 \max \left\{ 10^4 L \gamma^2 R_1^2 (T+1)^{-2}; 4R_1 (T+1)^{-1} \left( 52T(1+\log T)^2 \right)^{\frac{1}{p}} \gamma^{\frac{p-1}{p}} \sigma \right\}.$$

579 **Remark D.2.** One feature of the accelerated algorithm is the interpolation between the two regimes:  
 580 When  $\sigma$  is large, the algorithm achieves the  $O\left(T^{\frac{1-p}{p}}\right)$  convergence rate, which is the same as unac-  
 581 celerated algorithms; however, when  $\sigma$  is sufficiently small, the algorithm achieves the accelerated  
 582  $O(T^{-2})$  rate.

583 We also start the analysis of accelerated stochastic mirror descent with the following lemma.

584 **Lemma D.3.** Assume that  $f$  satisfies Assumption (1), (2), (3), (4) and  $\eta_t \leq \frac{1}{2L\alpha_t}$ , the iterate se-  
 585 quence  $(x_t)_{t \geq 1}$  output by Algorithm 2 satisfies the following

$$\begin{aligned} & \frac{\eta_t}{\alpha_t} (f(y_{t+1}) - f(x^*)) - \frac{\eta_t(1-\alpha_t)}{\alpha_t} (f(y_t) - f(x^*)) + \mathbf{D}_\psi(x^*, z_{t+1}) - \mathbf{D}_\psi(x^*, z_t) \\ & \leq \eta_t \langle \theta_t^u, x^* - z_t \rangle + \eta_t \langle \theta_t^b, x^* - z_t \rangle + 2\eta_t^2 \left( \|\theta_t^u\|_*^2 - \mathbb{E} \left[ \|\theta_t^u\|_*^2 \mid \mathcal{F}_{t-1} \right] \right) + 2\eta_t^2 \|\theta_t^b\|_*^2 + 2\eta_t^2 \mathbb{E} \left[ \|\theta_t^u\|_*^2 \mid \mathcal{F}_{t-1} \right]. \end{aligned}$$

586 *Proof of Lemma D.3.* We have

$$\begin{aligned} f(y_{t+1}) - f(x^*) &= \underbrace{f(y_{t+1}) - f(x_t)}_{\text{smoothness}} + \underbrace{f(x_t) - f(x^*)}_{\text{convexity}} \\ &\leq \langle \nabla f(x_t), y_{t+1} - x_t \rangle + \frac{L}{2} \|y_{t+1} - x_t\|^2 \\ &\quad + \alpha_t \langle \nabla f(x_t), x_t - x^* \rangle + (1-\alpha_t) (f(x_t) - f(x^*)) \\ &= \underbrace{(1-\alpha_t) \langle \nabla f(x_t), y_t - x_t \rangle}_{\text{convexity}} + \alpha_t \langle \nabla f(x_t), z_{t+1} - x^* \rangle \\ &\quad + \frac{L\alpha_t^2}{2} \|z_{t+1} - z_t\|^2 + (1-\alpha_t) (f(x_t) - f(x^*)) \\ &\leq (1-\alpha_t) (f(y_t) - f(x_t)) + (1-\alpha_t) (f(x_t) - f(x^*)) \\ &\quad + \alpha_t \langle \theta_t, x^* - z_{t+1} \rangle + \alpha_t \langle \tilde{\nabla} f(x_t), z_{t+1} - x^* \rangle + \frac{L\alpha_t^2}{2} \|z_{t+1} - z_t\|^2 \\ &\leq (1-\alpha_t) (f(y_t) - f(x^*)) + \alpha_t \langle \theta_t, x^* - z_{t+1} \rangle \\ &\quad + \alpha_t \langle \tilde{\nabla} f(x_t), z_{t+1} - x^* \rangle + \frac{L\alpha_t^2}{2} \|z_{t+1} - z_t\|^2. \end{aligned}$$

587 By the optimality condition, we have

$$\langle \eta_t \tilde{\nabla} f(x_t) + \nabla_x \mathbf{D}_\psi(z_{t+1}, z_t), x^* - z_{t+1} \rangle \geq 0$$

588 and thus

$$\left\langle \eta_t \tilde{\nabla} f(x_t), z_{t+1} - x^* \right\rangle \leq \left\langle \nabla_x \mathbf{D}_\psi(z_{t+1}, z_t), x^* - z_{t+1} \right\rangle.$$

589 Note that

$$\begin{aligned} \left\langle \nabla_x \mathbf{D}_\psi(z_{t+1}, z_t), x^* - z_{t+1} \right\rangle &= \left\langle \nabla \psi(z_{t+1}) - \nabla \psi(z_t), x^* - z_{t+1} \right\rangle \\ &= \mathbf{D}_\psi(x^*, z_t) - \mathbf{D}_\psi(z_{t+1}, z_t) - \mathbf{D}_\psi(x^*, z_{t+1}). \end{aligned}$$

590 Thus

$$\begin{aligned} \eta_t \left\langle \tilde{\nabla} f(x_t), z_{t+1} - x^* \right\rangle &\leq \mathbf{D}_\psi(x^*, z_t) - \mathbf{D}_\psi(x^*, z_{t+1}) - \mathbf{D}_\psi(z_{t+1}, z_t) \\ &\leq \mathbf{D}_\psi(x^*, z_t) - \mathbf{D}_\psi(x^*, z_{t+1}) - \frac{1}{2} \|z_{t+1} - z_t\|^2 \end{aligned}$$

591 where we have used that  $\mathbf{D}_\psi(z_{t+1}, z_t) \geq \frac{1}{2} \|z_{t+1} - z_t\|^2$  by the strong convexity of  $\psi$ . We have

$$\begin{aligned} f(y_{t+1}) - f(x^*) &\leq (1 - \alpha_t)(f(y_t) - f(x^*)) + \alpha_t \langle \theta_t, x^* - z_{t+1} \rangle \\ &\quad + \frac{\alpha_t}{\eta_t} \mathbf{D}_\psi(x^*, z_t) - \frac{\alpha_t}{\eta_t} \mathbf{D}_\psi(x^*, z_{t+1}) + \left( \frac{L\alpha_t^2}{2} - \frac{\alpha_t}{2\eta_t} \right) \|z_{t+1} - z_t\|^2. \end{aligned}$$

592 Dividing both sides by  $\frac{\alpha_t}{\eta_t}$  and using the condition  $L\eta_t\alpha_t \leq \frac{1}{2}$ , we have

$$\begin{aligned} &\frac{\eta_t}{\alpha_t} (f(y_{t+1}) - f(x^*)) + \mathbf{D}_\psi(x^*, z_{t+1}) - \mathbf{D}_\psi(x^*, z_t) \\ &\leq \frac{\eta_t(1 - \alpha_t)}{\alpha_t} (f(y_t) - f(x^*)) + \eta_t \langle \theta_t, x^* - z_t \rangle \\ &\quad + \eta_t \langle \theta_t, z_t - z_{t+1} \rangle - \frac{1 - L\eta_t\alpha_t}{2} \|z_{t+1} - z_t\|^2 \\ &\leq \frac{\eta_t(1 - \alpha_t)}{\alpha_t} (f(y_t) - f(x^*)) + \eta_t \langle \theta_t, x^* - z_t \rangle \\ &\quad + \frac{\eta_t^2 \|\theta_t\|_*^2}{2(1 - L\eta_t\alpha_t)} \\ &\leq \frac{\eta_t(1 - \alpha_t)}{\alpha_t} (f(y_t) - f(x^*)) + \eta_t \langle \theta_t^u + \theta_t^b, x^* - z_t \rangle \\ &\quad + 2\eta_t^2 \|\theta_t^u\|_*^2 + 2\eta_t^2 \|\theta_t^b\|_*^2 \end{aligned}$$

593 as needed. □

594 Similarly to the previous section, we define the following variables

$$\begin{aligned} Z_t &= z_t \left( \frac{\eta_t}{\alpha_t} (f(y_{t+1}) - f(x^*)) - \frac{\eta_t(1 - \alpha_t)}{\alpha_t} (f(y_t) - f(x^*)) + \mathbf{D}_\psi(x^*, z_{t+1}) - \mathbf{D}_\psi(x^*, z_t) \right. \\ &\quad \left. - \eta_t \langle \theta_t^b, x^* - z_t \rangle - 2\eta_t^2 \|\theta_t^b\|_*^2 - 2\eta_t^2 \mathbb{E} [\|\theta_t^u\|_*^2 \mid \mathcal{F}_{t-1}] \right) - \left( \frac{3}{8\lambda_t^2} + 24z_t^2\eta_t^4\lambda_t^2 \right) \mathbb{E} [\|\theta_t^u\|^2 \mid \mathcal{F}_{t-1}], \end{aligned}$$

$$\text{where } z_t = \frac{1}{2\eta_t\lambda_t \max_{i \leq t} \sqrt{2\mathbf{D}_\psi(x^*, x_i)} + 16Q\eta_t^2\lambda_t^2}$$

595 for a constant  $Q \geq 1$ . We also let  $S_t = \sum_{i=1}^t Z_i$ . Following the same analysis as in previous  
596 sections, we can obtain Lemma D.4 and Proposition D.5, for which we will omit the proofs here.  
597 The only step we need to pay attention to when showing Lemma D.4 is when we bound the sum

$$\sum_{t=1}^k \frac{z_t\eta_t}{\alpha_t} (f(y_{t+1}) - f(x^*)) - \frac{z_t\eta_t(1 - \alpha_t)}{\alpha_t} (f(y_t) - f(x^*)).$$

598 If we assume  $\frac{\eta_{t-1}}{\alpha_{t-1}} \geq \frac{\eta_t(1 - \alpha_t)}{\alpha_t}$ , since  $z_t$  is a decreasing sequence and  $\alpha_1 = 0$ , we can lower bound  
599 the above sum by the last term  $\frac{z_k\eta_k}{\alpha_k} (f(y_{k+1}) - f(x^*))$ , which gives us the desired inequality.

600 **Lemma D.4.** Assume that for all  $t \geq 1$ ,  $\eta_t$  satisfies  $\frac{\eta_{t-1}}{\alpha_{t-1}} \geq \frac{\eta_t(1-\alpha_t)}{\alpha_t}$ . For any  $\delta > 0$ , let  $E(\delta)$  be  
 601 the event that for all  $1 \leq k \leq T$

$$\begin{aligned} & \frac{z_k \eta_k}{\alpha_k} (f(y_{k+1}) - f(x^*)) + z_k \mathbf{D}_\psi(x^*, x_{k+1}) \\ & \leq z_1 \mathbf{D}_\psi(x^*, x_1) + \log \frac{1}{\delta} + \sum_{t=1}^k z_t \eta_t \langle x^* - x_t, \theta_t^b \rangle + 2 \sum_{t=1}^k z_t \eta_t^2 \|\theta_t^b\|_*^2 \\ & \quad + \sum_{t=1}^k \left( \left( 2z_t \eta_t^2 + \frac{3}{8\lambda_t^2} + 24z_t^2 \eta_t^4 \lambda_t^2 \right) \mathbb{E} \left[ \|\theta_t^u\|_*^2 \mid \mathcal{F}_{t-1} \right] \right). \end{aligned}$$

602 Then  $\Pr[E(\delta)] \geq 1 - \delta$ .

603 Finally, we state a general condition for the choice of  $\eta_t$  and  $\lambda_t$ , which follows exactly the same as  
 604 in Proposition 4.8. The proof for Theorem D.1 is a direct consequence of this.

605 **Proposition D.5.** We assume that the event  $E(\delta)$  from Lemma D.4 happens. Suppose that for some  
 606  $\ell \leq T$ , there are constants  $C_1$  and  $C_2$  such that for all  $t \leq \ell$

607 1.  $\lambda_t \eta_t = C_1$ ; 2.  $\sum_{t=1}^\ell \left( \frac{1}{\lambda_t} \right)^p \leq C_2$ ; 3.  $\left( \frac{1}{\lambda_t} \right)^{2p} \leq C_3 \left( \frac{1}{\lambda_t} \right)^p$ ; 4.  $\|\nabla f(x_t)\|_* \leq \frac{\lambda_t}{2}$ .

608 Then for all  $t \leq \ell + 1$

$$\frac{\eta_t}{\alpha_t} (f(y_{t+1}) - f(x^*)) + \mathbf{D}_\psi(x^*, z_{t+1}) \leq \frac{1}{2} (R_1 + 8AC_1)^2$$

609 for  $A \geq \max \left\{ \log \frac{1}{\delta} + 26\sigma^p C_2 + \frac{2\sigma^{2p} C_2 C_3}{A}; 1 \right\}$ .

610 *Proof of Theorem D.1.* 1. Note that  $\eta_t \leq \frac{1}{2c\gamma^2 L \alpha_t} \leq \frac{1}{2L\alpha_t}$  and

$$\begin{aligned} \frac{\eta_{t-1}}{\alpha_{t-1}} &= \frac{t^2}{8c\gamma^2 L} \\ \frac{\eta_t(1-\alpha_t)}{\alpha_t} &= \frac{(t+1)(t-1)}{8c\gamma^2 L} \end{aligned}$$

611 thus  $\frac{\eta_{t-1}}{\alpha_{t-1}} \geq \frac{\eta_t(1-\alpha_t)}{\alpha_t}$ . We have that with probability at least  $1 - \delta$ , event  $E(\delta)$  happens. Condition-  
 612 ing on this event, in 4.8 We choose

$$C_1 = \frac{R_1}{24\gamma}; \quad C_2 = \frac{\gamma}{26\sigma^p}; \quad C_3 = \frac{\gamma}{26T\sigma^p}; \quad A = 3\gamma.$$

613 We can verify the conditions of Proposition D.5 similarly as in previous section for these choices of  
 614  $C_1, C_2$ , and  $C_3$ .

615 We will show by induction that for all  $t \geq 1$ ,  $\|\nabla f(x_t)\|_* \leq \frac{\lambda_t}{2}$  and  
 616  $\max \{\|x_t - x^*\|, \|y_t - x^*\|, \|z_t - x^*\|\} \leq 2R_1$ .

617 For  $t = 1$ , notice that  $x_1 = y_1 = z_1$ . Thus, we have

$$\|\nabla f(x_1)\|_* = \|\nabla f(x_1) - \nabla f(x^*)\|_* \leq LR_1 \leq \frac{\lambda_1}{2}.$$

618 Now assume that the claim holds for  $1 \leq t \leq k$ . By Proposition D.5, we know that

$$\frac{2\eta_k}{\alpha_k} f(y_{k+1}) - f(x^*) + \|z_{k+1} - x^*\|^2 \leq 4R_1^2.$$

619 Furthermore

$$\begin{aligned} \|y_{k+1} - x^*\| &\leq (1 - \alpha_k) \|y_k - x^*\| + \alpha_k \|z_{k+1} - x^*\| \leq 2R_1 \\ \|x_{k+1} - x^*\| &\leq (1 - \alpha_k) \|y_{k+1} - x^*\| + \alpha_k \|z_{k+1} - x^*\| \leq 2R_1 \end{aligned}$$

620 For  $k \geq 1$  we have  $\alpha_{k+1} = \frac{2}{k+2} < 1$ ;  $\frac{\alpha_{k+1}}{1-\alpha_{k+1}} = \frac{2}{k} \leq \frac{4}{k+2} \leq 2\alpha_{t+1}$  and  $\alpha_t \leq \frac{3}{2}\alpha_{t+1}$ . Hence,

$$\begin{aligned}
\|\nabla f(x_{k+1})\|_* &\leq \|\nabla f(x_{k+1}) - \nabla f(y_{k+1})\|_* + \|\nabla f(y_{k+1}) - \nabla f(x^*)\|_* \\
&\leq L \|x_{k+1} - y_{k+1}\| + \sqrt{2L(f(y_{k+1}) - f(x^*))} \\
&\leq \frac{L\alpha_{k+1} \|x_{k+1} - z_{k+1}\|}{1 - \alpha_{k+1}} + 2R_1 \sqrt{\frac{L\alpha_t}{2\eta_t}} \\
&\leq 4LR_1 \frac{\alpha_{k+1}}{1 - \alpha_{k+1}} + 2\sqrt{\frac{3}{2}} c\gamma R_1 L\alpha_t \\
&\leq 8\gamma LR_1 \alpha_{t+1} + 3\sqrt{\frac{3}{2}} c\gamma LR_1 \alpha_{t+1} \\
&\leq (8 + 3\sqrt{\frac{3}{2}} c) R_1 \gamma L \alpha_{t+1} \\
&= \frac{16(8 + 3\sqrt{\frac{3}{2}} c) \lambda_{t+1}}{2c} \leq \frac{\lambda_{t+1}}{2}
\end{aligned}$$

621 as needed. Therefore, we have

$$\frac{\eta_T}{\alpha_T} (f(y_{T+1}) - f(x^*)) + \mathbf{D}_\psi(x^*, x_{T+1}) \leq 2R_1^2$$

622 which gives

$$\begin{aligned}
f(y_{T+1}) - f(x^*) &\leq \frac{2R_1^2 \alpha_T}{\eta_T} = 6R_1^2 c\gamma^2 L \alpha_T^2 \\
&= 6 \max \left\{ 10^4 L \gamma^2 R_1^2 (T+1)^{-2}; 6R_1 (T+1)^{-1} (26T)^{\frac{1}{p}} \gamma^{\frac{p-1}{p}} \sigma \right\}.
\end{aligned}$$

623 2. Following the similar steps to the proof of Theorem D.1, and noticing that  $(c_t)$  is a increasing  
624 sequence, we obtain the convergence rate.  $\square$
